# Supplementary material for: Does the age of acute care physicians impact their (1) crisis management performance and (2) learning after simulation-based education? A protocol for a multicentre prospective cohort study in Toronto and Ottawa, Canada
Source: PubMed Central journal article supplement — BMJ Open. 2018 Apr 21;8(4):e020940. doi: 10.1136/bmjopen-2017-020940 (PMC5914762; doi:10.1136/bmjopen-2017-020940), 2018-04-21
Supplement: bmjopen-2017-020940.draft_revisions.pdf [file bmjopen-2017-020940.draft_revisions.pdf]

# BMJ Open

BMJ Open is committed to open peer review. As part of this commitment we make the peer review history of every article we publish publicly available.

When an article is published we post the peer reviewers' comments and the authors' responses online. We also post the versions of the paper that were used during peer review. These are the versions that the peer review comments apply to.

The versions of the paper that follow are the versions that were submitted during the peer review process. They are not the versions of record or the final published versions. They should not be cited or distributed as the published version of this manuscript.

BMJ Open is an open access journal and the full, final, typeset and author-corrected version of record of the manuscript is available on our site with no access controls, subscription charges or pay-per-view fees (<http://bmjopen.bmj.com>).

If you have any questions on BMJ Open's open peer review process please email [info.bmjopen@bmj.com](mailto:info.bmjopen@bmj.com)

# BMJ Open

## Impact of acute care physician's age on crisis management performance and learning after simulation-based education: protocol for a prospective cohort trial

|                               |                                                                                                                                                                                                                                                                                                                                                                                                                                                                                                                                                                                                                                                                                                                                                                                                                                                                                                                                                                                                                                                                                                                                                                                                                                                          |
|-------------------------------|----------------------------------------------------------------------------------------------------------------------------------------------------------------------------------------------------------------------------------------------------------------------------------------------------------------------------------------------------------------------------------------------------------------------------------------------------------------------------------------------------------------------------------------------------------------------------------------------------------------------------------------------------------------------------------------------------------------------------------------------------------------------------------------------------------------------------------------------------------------------------------------------------------------------------------------------------------------------------------------------------------------------------------------------------------------------------------------------------------------------------------------------------------------------------------------------------------------------------------------------------------|
| Journal:                      | <i>BMJ Open</i>                                                                                                                                                                                                                                                                                                                                                                                                                                                                                                                                                                                                                                                                                                                                                                                                                                                                                                                                                                                                                                                                                                                                                                                                                                          |
| Manuscript ID                 | bmjopen-2017-020940                                                                                                                                                                                                                                                                                                                                                                                                                                                                                                                                                                                                                                                                                                                                                                                                                                                                                                                                                                                                                                                                                                                                                                                                                                      |
| Article Type:                 | Protocol                                                                                                                                                                                                                                                                                                                                                                                                                                                                                                                                                                                                                                                                                                                                                                                                                                                                                                                                                                                                                                                                                                                                                                                                                                                 |
| Date Submitted by the Author: | 04-Dec-2017                                                                                                                                                                                                                                                                                                                                                                                                                                                                                                                                                                                                                                                                                                                                                                                                                                                                                                                                                                                                                                                                                                                                                                                                                                              |
| Complete List of Authors:     | <p>Alam, Fahad; University of Toronto Faculty of Medicine, Anesthesia<br/> LeBlanc, Vicki; University of Ottawa, Department of Innovation in Medical Education<br/> Baxter, Alan; University of Ottawa, Department of Anesthesiology and Pain Medicine<br/> Tarshis, Jordan; University of Toronto, Department of Anesthesia<br/> Piquette, Dominique; University of Toronto, Department of Critical Care Medicine<br/> Gu, Yuqi; University of Ottawa, Department of Anesthesiology and Pain Medicine<br/> Filipkowska, Caroline; University of Toronto, Department of Emergency Medicine<br/> Krywenky, Ashley; University of Ottawa, Department of Emergency Medicine<br/> Kester, Nicole; University of Toronto, Department of Emergency Medicine<br/> Cardinal, Pierre; University of Ottawa, Department of Critical Care Medicine<br/> Au, Shelly; Sunnybrook Health Sciences Centre, Department of Anesthesia<br/> Lam, Sandy; University of Ottawa, Department of Anesthesiology and Pain Medicine<br/> Boet, Sylvain; University of Ottawa, Department of Anesthesiology and Pain Medicine<br/> Perioperative Anesthesia Clinical Trials Group , Perioperative Anesthesia Clinical Trials; University of Manitoba, Department of Anesthesia</p> |
| Keywords:                     | Adult anaesthesia < ANAESTHETICS, MEDICAL EDUCATION & TRAINING, Adult intensive & critical care < INTENSIVE & CRITICAL CARE, EDUCATION & TRAINING (see Medical Education & Training)                                                                                                                                                                                                                                                                                                                                                                                                                                                                                                                                                                                                                                                                                                                                                                                                                                                                                                                                                                                                                                                                     |
|                               |                                                                                                                                                                                                                                                                                                                                                                                                                                                                                                                                                                                                                                                                                                                                                                                                                                                                                                                                                                                                                                                                                                                                                                                                                                                          |

SCHOLARONE™  
Manuscripts

**Title**

Impact of acute care physician's age on crisis management performance and learning after simulation-based education: protocol for a prospective cohort trial

**Authors**

Fahad Alam ([Fahad.alam@sunnybrook.ca](mailto:Fahad.alam@sunnybrook.ca))<sup>1</sup>, Vicki R LeBlanc ([vleblan3@uottawa.ca](mailto:vleblan3@uottawa.ca))<sup>2</sup>, Alan Baxter ([abaxter@ottawahospital.on.ca](mailto:abaxter@ottawahospital.on.ca))<sup>3</sup>, Jordan Tarshis ([Jordan.tarshis@sunnybrook.ca](mailto:Jordan.tarshis@sunnybrook.ca))<sup>1</sup>, Dominique Piquette ([Dominique.piquette@sunnybrook.ca](mailto:Dominique.piquette@sunnybrook.ca))<sup>4</sup>, Yuqi Gu ([GuY@Dal.Ca](mailto:GuY@Dal.Ca))<sup>3</sup>, Caroline Filipkowska ([caroline.filipkowska@sunnybrook.ca](mailto:caroline.filipkowska@sunnybrook.ca))<sup>5</sup>, Ashley Krywenky ([akrywenky@toh.ca](mailto:akrywenky@toh.ca))<sup>6</sup>, Nicole Kester-Greene ([nicole.kester@me.com](mailto:nicole.kester@me.com))<sup>5</sup>, Pierre Cardinal ([PCARDINAL@toh.ca](mailto:PCARDINAL@toh.ca))<sup>7</sup>, Shelly Au ([shelly.au@sunnybrook.ca](mailto:shelly.au@sunnybrook.ca))<sup>1</sup>, Sandy Lam ([salam@toh.ca](mailto:salam@toh.ca))<sup>3</sup>, Sylvain Boet ([sboet@toh.on.ca](mailto:sboet@toh.on.ca))<sup>2,3</sup>; and Perioperative Anesthesia Clinical Trials Group ([canadianpact@gmail.com](mailto:canadianpact@gmail.com))<sup>8,\*</sup>

1. Department of Anesthesia, Sunnybrook Health Sciences Centre, University of Toronto, Toronto, ON
2. Department of Innovation in Medical Education and University of Ottawa Skills and Simulation Centre, The Ottawa Hospital, University of Ottawa, Ottawa, ON
3. Department of Anesthesiology and Pain Medicine, The Ottawa Hospital, University of Ottawa, Ottawa, ON
4. Department of Critical Care Medicine, Sunnybrook Health Sciences Centre, University of Toronto, Toronto, ON
5. Department of Emergency Medicine, Sunnybrook Health Sciences Centre, University of Toronto, Toronto, ON
6. Department of Emergency Medicine, The Ottawa Hospital, University of Ottawa, Ottawa, ON
7. Department of Critical Care Medicine, The Ottawa Hospital, Ottawa, ON
8. Department of Anesthesia, University of Manitoba, Winnipeg, MB

- 1  
2  
3  
4 \* Current members of the Perioperative Anesthesia Clinical Trials Group (see  
5 acknowledgement section)  
6  
7  
8

9 **Word Count (excluding tables, figures, references):** 2704  
10  
11  
12

13 **Number of Tables/Figures:** 1 Table, 1 Figure  
14  
15

16  
17  
18 **Corresponding Author**  
19

20 Fahad Alam  
21

22 Department of Anesthesia, Sunnybrook Health Sciences Centre  
23

24 2075 Bayview Ave, Room M3-200, Toronto, Ontario, Canada, M4N 3M5  
25

26 Tel (+1) 416-480-4864; Fax (+1) 416-480-6039; E-mail: [fahad.alam@sunnybrook.ca](mailto:fahad.alam@sunnybrook.ca)  
27  
28  
29  
30  
31

32 **Keywords (3-10 words):**  
33

34 Ageing; Continuing Education and Training; Patient Safety; Randomized Controlled Trial;  
35  
36

37 Simulation Education  
38  
39  
40  
41  
42  
43  
44  
45  
46  
47  
48  
49  
50  
51  
52  
53  
54  
55  
56  
57  
58  
59  
60

## Abstract

**Introduction:** The proportion of older acute care physicians (ACPs) has been steadily increasing. Ageing is associated with physiological changes and prospective research investigating how such age-related physiological changes affect clinical performance, including crisis resource management (CRM) skills, is lacking. There is a gap in the literature on whether physicians' age influences baseline CRM performance and also learning from simulation. We aim to investigate whether ageing is associated with baseline CRM skills of ACPs (emergency, critical care, anesthesia) using simulated crisis scenarios and to assess whether ageing influences learning from simulation-based education.

**Methods and Analysis:** This is a prospective cohort multicenter study recruiting ACPs from the Universities of Toronto and Ottawa, Canada. Each participant will manage an Advanced Cardiovascular Life Support (ACLS) crisis simulated scenario (pre-test) and then be debriefed on their CRM skills. They will then manage another simulated crisis scenario (immediate post-test). Three months after, participants will return to manage a third simulated crisis scenario (retention post-test). The relationship between biological age and chronological age will be assessed by measuring the participants CRM skills and their ability to learn from high-fidelity simulation.

**Ethics and Dissemination:** This protocol was approved by Sunnybrook Health Sciences Centre Research Ethics Board (REB Number 140-2015) and the Ottawa Health Science Network Research Ethics Board (#20150173-01H). The results will be disseminated in a peer reviewed journal, and at scientific meetings.

**Trial Registration:** NCT02683447; Pre-results

**Strengths and Limitations of the Study:**

- Acute care physicians are recruited from various institutions across Ontario from three specialties
- Participants are immediately debriefed by experts on their crisis resource management performance
- Simulation environment for each scenario is tailored to the participant's specialty
- Ageing physicians likely did not train with mannequin-based simulation compared to physicians who recently completed their certification

For peer review only

## Introduction

The proportion of older acute care physicians (ACPs) has been steadily increasing.[1] Within Canada, approximately 32% - 39% of anesthesiologists are over the age of 55. A survey of members of the American Society of Anesthesiologists in 2013 revealed that a greater percentage of members are older (>55) in 2013 compared to 2007. These numbers are similar for emergency and critical care physicians, where the proportion of the workforce over 55 years of age is also 33% - 40%.[2] This shift in the demographics may be explained by various factors. It can partially be attributed to the recent economic crisis leading to delayed retirement. Also, in the early 1990s, there was a reduction of residency positions, likely explaining the smaller population of middle aged ACPs and hence, increasing demand for the older population to meet the needs of the healthcare system.[3, 4] Recent studies have also reported an overall shortage of healthcare providers of all ages with conditions varying by region. This is also another reason for a greater number of older ACPs currently working, as it calls upon delayed retirement of the older physicians to meet the demands of the healthcare system secondary to this shortage.[5-7]

Acute care specialties such as critical care, emergency medicine and anesthesiology, require its providers to both excel at technical and non-technical skills (e.g. teamwork, communication and leadership) and function at a high cognitive level in a fast-paced environment that requires quick decision-making and problem solving. Ageing is associated with physiological changes, which in turn can influence both a physician's clinical and decision-making abilities. The time required for processing information is prolonged and decision-making can be compromised in physicians as they age.[8, 10, 11, 14] Physiological stress impacts the ageing physician to great extent with potential consequences on performance. The prevalence of stress, illness, fatigue, and dementia increases as one age.[3, 8-11] Manual dexterity can also be affected with the onset of arthritis and alterations in visual acuity.[3, 12] Siu and colleagues

1  
2  
3 found that anesthesiologists' age and years from residency were associated with decreased  
4 simulated cricothyroidotomy proficiency.[5, 13]  
5  
6

7  
8 Research investigating how such ageing-related physiological changes affect clinical  
9 performance and patient safety is limited.[12, 15] The common idea that ageing physicians  
10 compensate through experience and pattern recognition from previous similar clinical  
11 situations[13, 14] has been called into question. First, physiological studies have shown that  
12 neural compensation mechanisms to ageing are limited and cannot prevent a certain amount of  
13 cognitive decline in the long-term.[16] Secondly, Duclos *et al.* found that older surgeons had an  
14 increased rate of patient complications after thyroid surgery.[17] In addition, 10 years of  
15 litigation data shows that anesthesiologists in British Columbia, Ontario, and Quebec who are  
16 older than 65 have 1.5 times the risk of being involved in litigation compared with those aged  
17 less than 51, with the settlements being generally larger.[12, 13] For all specialties, disciplinary  
18 incidents involving physicians are likely to occur later in practice, increasing with each 10-year  
19 interval since first getting a license.[14, 15, 18] Moreover, the degree of injury identified in the  
20 claims of physicians 65 years of age or older was of greater severity.[14] Lastly, studies have  
21 shown that long term medical knowledge retention can be negatively impacted with increasing  
22 age as well [19]. Overall, human physiology, previous investigations, litigation, disciplinary and  
23 critical event data strongly suggests that ageing effects among physicians are not compensated  
24 by greater experience as previously thought.  
25  
26  
27  
28  
29  
30  
31  
32  
33  
34  
35  
36  
37  
38  
39  
40  
41  
42  
43  
44  
45  
46

47 Crisis Resource Management (CRM) skills are essential clinical skills within acute care  
48 specialties, and are vital for patient safety. CRM encompasses technical skills (e.g. defibrillation,  
49 drug preparation, intubation), as well as a rapid and structured approach to non-technical,  
50 cognitive skills such as decision-making, task management, situational awareness and team  
51  
52  
53  
54  
55  
56  
57  
58  
59  
60



1  
2  
3 management. CRM skills are crucial during life threatening crises and are precisely the  
4 type of processing and decision making skills that may decline as one ages, thus contributing to  
5 patient safety concerns described above.  
6  
7  
8  
9

10 Evidence shows that high-fidelity simulation-based education is effective for learning  
11 CRM, transferring skills to the clinical setting, and improving patient outcomes.[20] However,  
12 the effectiveness of simulation-based education for teaching CRM has mainly focused on  
13 undergraduate and post-graduate learners, whereas limited data is available for the ageing  
14 physician population.[21] Despite the limited evidence to support claims that simulation for  
15 continuing professional development actually improves learning,[22] simulation-based  
16 education has been recommended as a tool to train and assess ACPs.[12, 23] Thus, there is a  
17 need to investigate if physicians' age influences baseline CRM performance or learning from  
18 simulation-based education.  
19  
20  
21  
22  
23  
24  
25  
26  
27  
28  
29  
30  
31  
32  
33  
34  
35  
36  
37  
38  
39  
40  
41  
42  
43  
44  
45  
46  
47  
48  
49  
50  
51  
52  
53  
54  
55  
56  
57  
58  
59  
60

## Methods and Analysis

### *Aim:*

Our research aims are to investigate whether ageing is correlated with baseline CRM skills in acute care physicians and to determine whether ageing influences CRM skill learning from high fidelity simulation and debriefing.

We hypothesize that ACPs' baseline CRM performance as assessed using high-fidelity, simulation-based scenarios decline as physician age increase. Our secondary hypothesis is that although ACPs' CRM performance will increase immediately following simulation-based practice scenarios with feedback, increasing physician age will negatively impact the retention of CRM skills.

### *Design:*

This study is a prospective cohort multicenter interventional study. This study has been registered on **ClinicalTrials.gov** (NCT02683447) and this manuscript follows the SPIRIT (Standard Protocol Items: Recommendations for Interventional Trials) reporting guidelines.[24]

### *Ethics:*

This study will recruit from two large, university-affiliated tertiary centres in Toronto and Ottawa, Canada. Ethical approval was received from the Ottawa Health Science Network Research Ethics Board (#20150173-01H) (Ottawa, ON) and the Sunnybrook Health Sciences Centre, Research Ethics and Human Research Protections Program (#140-2015) (Toronto, ON). Written informed consent and a confidentiality agreement will be obtained from all participants by a trained research assistant or a study investigator. ACPs from the academic affiliated sites of

1  
2  
3 both universities will be approached for recruitment, with data collection being conducted locally  
4  
5 in each center. Throughout the study and upon completion of the trial, all data will be stored on  
6  
7 secure servers at each sites institution. Data will be transferred using secure, encrypted, protected  
8  
9 file transfer software.  
10  
11  
12  
13

14  
15 *Participant Characteristics:*

16  
17 Practicing emergency, critical care and anesthesia staff with a minimum of 5 years of  
18  
19 clinical practice post-certification will be approached for participation. Participants will not be  
20  
21 scheduled for a study session on a post-call day. Participants will be recruited from both  
22  
23 academic and community sites. In Toronto, a formal simulation training curriculum for faculty  
24  
25 does not exist. In Ottawa, a curriculum is in development and is in its infancy when it comes to  
26  
27 implementation.  
28  
29  
30  
31  
32

33  
34 *Simulation Scenario Development:*

35  
36 The core concepts pertaining to CRM skills and subsequent management of pulseless  
37  
38 electrical activity (PEA) arrest will be consolidated into one document by the principal  
39  
40 investigators (FA and SB) and then sent out to three faculty acute care physicians (one from each  
41  
42 specialty involved) from Universities not involved in the recruitment, who are trained advanced  
43  
44 cardiovascular life support (ACLS) instructors, for review and revisions. Once core concepts are  
45  
46 agreed upon, the three simulation scenarios will be developed. Each scenario will then be piloted  
47  
48 before recruitment to ensure an equal degree of difficulty.  
49  
50  
51  
52

53  
54 *Data Collection:*  
55  
56  
57

1  
2  
3 Research personnel at Sunnybrook Health Sciences Centre will generate computer-based  
4 randomization of scenarios for all participants. Study participants will be blinded to their  
5 randomization assignment and un-blinding will not occur. The simulation environment for each  
6 scenario will be tailored to their respective specialty (i.e. Intensive Care Unit, Operating Room,  
7 and Emergency Room). Scenarios will be designed by an interdisciplinary group and will be  
8 piloted before recruitment to ensure an equal degree of difficulty. It will consist of a unique  
9 inciting event and will result in PEA arrests.  
10  
11  
12  
13  
14  
15  
16  
17  
18

19 Study visits for all participants are listed in Table 1. On day one, participants will  
20 complete a demographic questionnaire to *quantify potential confounding factors*, such as  
21 previous simulation, ACLS and crisis management experience and a life expectancy  
22 questionnaire online to determine subject's biological versus chronological age  
23 ([www.projectbiglife.ca](http://www.projectbiglife.ca)). Depending on certain lifestyle factors, a person might have a 'younger  
24 or older' biological age when compared to their stated chronological age.[25] Next, a  
25 standardized structured orientation session will be held for each participant, including a non-  
26 crisis simulated scenario for familiarization with the simulation environment. The scenario will  
27 be an induction of general anesthesia using rapid sequence induction (a common technique  
28 performed by all three acute care specialties in this study).  
29  
30  
31  
32  
33  
34  
35  
36  
37  
38  
39  
40  
41

42 Participants will manage three distinct scenarios for this study. All three scenarios will  
43 be matched for difficulty. The first will be a PEA arrest scenario (pre-test), followed by a 20  
44 minute facilitator-led debrief on their CRM performance. They will then manage another PEA  
45 crisis scenario (immediate post-test). Three months later, participants will return and manage a  
46 third PEA arrest scenario (retention post-test) in addition to a questionnaire to assess whether  
47 they have recently completed ACLS training. The retention post-test can be completed starting  
48  
49  
50  
51  
52  
53  
54  
55  
56  
57  
58  
59  
60

1  
2  
3 at 3 months (up to 6 months) following the initial pre-test. These scenarios will all be video-  
4 recorded and all data will be stored on encrypted devices in compliance with local privacy  
5 policies, at each institution. Following a pre-written standard script, confederates will  
6  
7 serve as a respiratory technician and nurse to be directed by the participant, but they will not  
8 provide tips or guidance in terms of how to manage the crisis. Two raters who have not worked  
9  
10 with the participants, blinded to the study hypotheses and test phase will evaluate the  
11  
12 participant's performance using validated assessment tools stated below.  
13  
14  
15  
16  
17  
18  
19  
20  
21

22 *Performance Measures:*

23  
24 The Ottawa Global Rating Scale (GRS) is a tool that has shown validity and reliability  
25 evidence for measuring non-technical CRM skills.[26] It assesses each of the following  
26 categories on a 7-point anchored scale: situational awareness, leadership, problem solving,  
27  
28 communication, resource utilization and overall performance.  
29  
30  
31  
32

33 A simple checklist that has been shown to be a reliable tool for PEA arrest published  
34 by the Heart and Stroke Foundation will be used to assess for adherence to ACLS algorithm  
35 (technical skills) in addition to the quality of cardiopulmonary resuscitation.[27] Within each  
36 category, the participant gets a dichotomous option ("yes" or "no") for each item required and  
37  
38 the final score will be determined by tallying up the "yes" scores.  
39  
40  
41  
42  
43  
44  
45  
46

47 *Outcome measures:*

48  
49 We will assess the relationship of biological and chronological age with:

- 50  
51
- 52 • CRM skills (Primary Outcome), as measured by the total Ottawa GRS[26] score and the  
53 Heart and Stroke ACLS checklist for PEA.[27]  
54  
55  
56  
57

- Learning from high-fidelity simulation education (Secondary Outcome), measured by change in performance *from pre-test, immediate post-test, and retention post-test* using the Ottawa GRS scale[26] and the ACLS checklist for PEA.[27]

### *Statistical Analysis:*

Descriptive statistics will be calculated for all variables of interest. Continuous measures such as age will be summarized using means and standard deviations whereas categorical measures will be summarized using counts and percentages.

To test the first hypothesis, the association between CRM skills and age measured using the Ottawa GRS and ACLS checklist, we will use a Pearson correlation (or Spearman correlation for non-normal data). We will then conduct a multivariable linear regression model analysis including demographic variables of interest (i.e. past simulation experience, previous ACLS management) and time of retention test (i.e., between 3-6 months following initial post-test) as predictor variables. This model will also adjust for the correlation among observations taken from the same site.

The secondary outcome of change in the Ottawa GRS and ACLS checklist score over time will be analyzed using a repeated measures analysis of variance (ANOVA), adjusting for the correlation among observations from the same participant. This analysis will be followed by specific pairwise comparisons: 1- pre-test (scenario 1) compared to immediate post-test (scenario 2), and 2- immediate post-test (scenario 2) compared to retention post-test (scenario 3).

### *Sample Size Estimate:*

1  
2  
3 Our primary analysis looks at the relationship between age and CRM skills. A sample of  
4  
5 60 will provide 80% power at alpha of 0.05 to detect a correlation of 0.72 or greater (a high  
6  
7 correlation) compared to a null hypothesis value of 0.5 (a moderate correlation). The sample size  
8  
9 calculation was carried out using PASS Version 12 (Hintze, J. (2014). NCSS, LLC. Kaysville,  
10  
11 Utah).

### 12 13 14 15 16 17 **Ethics and Dissemination**

18  
19 This study will explore the relationship between ageing with CRM performance and  
20  
21 learning in a simulated clinical setting. As such, the results will be a critical first step in  
22  
23 informing continuing professional development practices and be the foundation for future studies  
24  
25 investigating this medical population. Furthermore, no matter the outcome, the results of this  
26  
27 study will be part of the discussion in helping shape not only national policy regarding practice  
28  
29 assessment, but also help guide continuing professional development for ageing physicians.

30  
31  
32  
33 This study aims to investigate whether ageing is correlated with baseline CRM skills in  
34  
35 ACPs and determine whether ageing influences the acquisition and retention of CRM skills from  
36  
37 theatre-based simulation and debriefing. If ageing does have an impact on CRM skills in  
38  
39 physicians, then methods can be implemented aimed at assessing and intervening through  
40  
41 continuing professional development earlier in a physician's career. Hopefully, this can prevent  
42  
43 potential negative patient outcomes. One such method could be through the use of simulation,  
44  
45 but this study will first delineate whether this method of instruction needs to be modified for  
46  
47 older more experienced clinicians. If they do not learn the same way as residents, and we are  
48  
49 delivering instruction based on research conducted with junior learners, then this may be  
50  
51 ineffective for older physicians. This study will help clarify this uncertainty.  
52  
53  
54  
55  
56  
57  
58  
59  
60

1  
2  
3 The main challenge of this study is recruiting and scheduling physicians. Financial  
4 compensation has been identified as a barrier for staff participation in simulation sessions.[28]  
5  
6 To mitigate this, we include continuing professional development section 3 credits for all  
7  
8 participants in order to facilitate recruitment, allowing participants to track and document their  
9  
10 skills, knowledge and experience that is gained formally and informally as it is mandatory for all  
11  
12 practicing physicians complete a required number of credits to maintain their status with the  
13  
14 Royal College of Physicians and Surgeons of Canada. There also is potential for an unintentional  
15  
16 recruitment bias since ageing physicians likely did not train with mannequin-based simulation.  
17  
18 To account for this, investigators will present at grand rounds with each acute care department to  
19  
20 emphasize the implications of this study. Another challenge might be the concept of biological  
21  
22 age vs. chronological age. This study will be using both chronological and biological age to  
23  
24 mitigate this potential confounder.  
25  
26  
27  
28  
29

30  
31 Findings will be presented at local and national meetings (e.g., Canadian  
32  
33 Anesthesiologists' Society Annual Meeting) and we plan to publish our study in a peer-reviewed  
34  
35 journal as an open access article. Lastly, we intend to discuss findings at national specialty  
36  
37 societies, interested provincial Colleges of Medicine and the Royal College of Physicians and  
38  
39 Surgeons, with the goal of developing and implementing appropriate continuing education  
40  
41 strategies for ACPs.  
42  
43

44  
45 In conclusion, the results from this study will fill in the gap in the literature on whether  
46  
47 physicians' age influences baseline CRM performance and also learning from simulation. The  
48  
49 results will be a critical first step in helping shape and develop continuing education tailored to  
50  
51 physicians' age.  
52  
53  
54  
55  
56  
57  
58  
59  
60



**List of Abbreviations**

**ACLS**= Advance Cardiac Life Support

**ACPs**= acute care physicians

**CRM** = crisis resource management

**GRS**= Global Rating Scale

**PEA**= pulseless electrical activity

For peer review only

## Acknowledgements

We would like to thank and acknowledge: Current members of the Perioperative Anesthesia Clinical Trials Group (Eric Jacobsohn (Chair) University of Manitoba; Scott Beattie, University of Toronto; André Denault, Université de Montréal; Ron George, Dalhousie University; Hilary Grocott, University of Manitoba; Richard Hall, Dalhousie University; Heather McDonald, University of Manitoba; Daniel I. McIsaac, University of Ottawa; C. David Mazer, University of Toronto; Manoj Lalu, University of Ottawa; Sonia Sampson, Memorial University; Alexis Turgeon, Université Laval; Homer Yang, University of Ottawa); Dr. Alex Kiss from Sunnybrook Research Institute for his insights on data analysis; Susan DeSousa for her assistance at the Sunnybrook Simulation Centre; Kathrina Flores and Jessica Pacquing for their role as confederates at Sunnybrook Health Sciences Centre.

**Author's contributions**

FA and SB contributed to secure research funding and conceived and designed all aspects of the study protocol. AB, VL, JT, DP, CF, NK-G, YG, AK, PC, SA and SL contributed to the study design. FA, SB, and SA drafted and finalized the manuscript. All authors have approved the final manuscript. This study has been endorsed by the Perioperative Anesthesia Clinical Trials Group.

For peer review only

## Funding

At the time of submission, this study has received two grants from (1) Phil R. Manning Research Award; Continuing Medical Education, the Society for Academic Continuing Medical Education; and (2) Department of Innovation in Medical Education, Education Healthcare Grant, University of Ottawa. Dr. Boet was supported by The Ottawa Hospital Anesthesia Alternate Funds Association. Funders have no role in the study design, data collection, management, analysis or interpretation of the data.

1  
2  
3  
4  
5  
6  
7  
8  
9  
10  
11  
12  
13  
14  
15  
16  
17  
18  
19  
20  
21  
22  
23  
24  
25  
26  
27  
28  
29  
30  
31  
32  
33  
34  
35  
36  
37  
38  
39  
40  
41  
42  
43  
44  
45  
46  
47  
48  
49  
50  
51  
52  
53  
54  
55  
56  
57  
58  
59  
60

**Competing Interests**

The authors have no conflicts of interest to declare.

For peer review only

**Table 1: Study visits**

|                                           | Visit -1 | Visit 0 | Visit 1 | Visit 2 | Visit 3 |
|-------------------------------------------|----------|---------|---------|---------|---------|
| <b>ENROLMENT:</b>                         |          |         |         |         |         |
| Eligibility screen                        | X        |         |         |         |         |
| Informed consent                          | X        |         |         |         |         |
| Allocation                                |          | X       |         |         |         |
| <b>INTERVENTIONS:</b>                     |          |         |         |         |         |
| Demographic questionnaire                 |          |         | X       |         |         |
| Life expectancy questionnaire             |          |         | X       |         |         |
| Orientation and non-crisis scenario       |          |         | X       |         |         |
| Pre-test                                  |          |         | X       |         |         |
| Debrief *                                 |          |         | X       | X       |         |
| Immediate post-test                       |          |         | X       |         |         |
| Retention post-test                       |          |         |         | X       |         |
| <b>ASSESSMENTS:</b>                       |          |         |         |         |         |
| Ottawa global rating scale **             |          |         |         |         | X       |
| Advance cardiac life support checklist ** |          |         |         |         | X       |

\* to be performed by experienced debriefers \*\*to be performed by two independent raters

## References

1. Information ClfH: Geographic Distribution of Physicians in Canada. 2005.
2. Colleges AoAM: Center for Workforce Studies: 2012 Physician Specialty Data Book. 2012.
3. Katz JD: Issues of concern for the aging anesthesiologist. *Anesthesia & Analgesia* 2001, 92:1487-1492.
4. Baird M, Daugherty L, Kumar KB, Arifkhanova A: The Anesthesiologist Workforce in 2013. 2014.
5. Siu LW, Boet S, Borges BC, Bruppacher HR, LeBlanc V, Naik VN, Riem N, Chandra DB, Joo HS: High-fidelity simulation demonstrates the influence of anesthesiologists' age and years from residency on emergency cricothyroidotomy skills. *Anesthesia & Analgesia* 2010, 111:955-960.
6. An Analysis of the Labor Markets for Anesthesiology  
[\[http://www.rand.org/pubs/technical\\_reports/TR688\]](http://www.rand.org/pubs/technical_reports/TR688)
7. USHRAS A: The Critical Care Workforce. 2006.
8. Durning SJ, Artino AR, Holmboe E, Beckman TJ, van der Vleuten C, Schuwirth L: Aging and cognitive performance: challenges and implications for physicians practicing in the 21st century. *Journal of Continuing Education in the Health Professions* 2010, 30:153-160.
9. Eva KW: The aging physician: changes in cognitive processing and their impact on medical practice. *Academic Medicine* 2002, 77:S1-S6.
10. Trunkey DD, Botney R: Assessing competency: a tale of two professions. *Journal of the American College of Surgeons* 2001, 192:385-395.
11. Turnbull J, Carbotte R, Hanna E, Norman G, Cunningham J, Ferguson B, Kaigas T: Cognitive difficulty in physicians. *Academic Medicine* 2000, 75:177-181.
12. Baxter AD, Boet S, Reid D, Skidmore G: The aging anesthesiologist: a narrative review and suggested strategies. *Canadian Journal of Anesthesia/Journal canadien d'anesthésie* 2014, 61:865-875.
13. Norman G, Young M, Brooks L: Non-analytical models of clinical reasoning: The role of experience. *Medical education* 2007, 41:1140-1145.
14. Tessler MJ, Shrier I, Steele RJ: Association between anesthesiologist age and litigation. *Survey of Anesthesiology* 2012, 56:263-264.
15. Alam A, Khan J, Liu J, Klemensberg J, Griesman J, Bell CM: Characteristics and rates of disciplinary findings amongst anesthesiologists by professional colleges in Canada. *Canadian Journal of Anesthesia/Journal canadien d'anesthésie* 2013, 60:1013-1019.
16. Hedden T, Gabrieli JD: Insights into the ageing mind: a view from cognitive neuroscience. *Nature reviews neuroscience* 2004, 5:87-96.
17. Duclos A, Peix J-L, Colin C, Kraimps J-L, Menegaux F, Pattou F, Sebag F, Touzet S, Bourdy S, Voirin N: Influence of experience on performance of individual surgeons in thyroid surgery: prospective cross sectional multicentre study. *BMJ* 2012, 344:d8041.
18. Khaliq AA, Dimassi H, Huang C-Y, Narine L, Smego RA: Disciplinary action against physicians: who is likely to get disciplined? *The American journal of medicine* 2005, 118:773-777.
19. Custers EJ, Ten Cate OT: Very long-term retention of basic science knowledge in doctors after graduation. *Med Educ* 2011, 45:422-430
20. Boet S, Bould MD, Fung L, Qosa H, Perrier L, Tavares W, Reeves S, Tricco AC: Transfer of learning and patient outcome in simulated crisis resource management: a systematic review. *Canadian Journal of Anesthesia/Journal canadien d'anesthésie* 2014, 61:571-582.
21. Marinopoulos SS, Dorman T, Ratanawongsa N, Wilson LM, Ashar BH, Magaziner JL, Miller RG, Thomas PA, Prokopowicz GP, Qayyum R: Effectiveness of continuing medical education. 2007.

- 1
- 2
- 3 22. Khanduja PK, Bould MD, Naik VN, Hladkowicz E, Boet S: The role of simulation in continuing
- 4 medical education for acute care physicians: a systematic review\*. *Critical care medicine* 2015,
- 5 43:186-193.
- 6 23. Steadman RH: Improving on reality: can simulation facilitate practice change? *Anesthesiology*
- 7 2010, 112:775-776.
- 8 24. Chan A-W, Tetzlaff JM, Altman DG, Laupacis A, Gøtzsche PC, Krlježa-Jerić K, Hróbjartsson A,
- 9 Mann H, Dickersin K, Berlin JA: SPIRIT 2013 statement: defining standard protocol items for
- 10 clinical trials. *Ann Intern Med* 2013, 158:200-207.
- 11 25. Roizen MF: *RealAge: Are you as young as you can be?*: Harper Collins; 2010.
- 12 26. Kim J, Neilipovitz D, Cardinal P, Chiu M, Clinch J: A pilot study using high-fidelity simulation to
- 13 formally evaluate performance in the resuscitation of critically ill patients: The University of
- 14 Ottawa Critical Care Medicine, High-Fidelity Simulation, and Crisis Resource Management I
- 15 Study. *Critical care medicine* 2006, 34:2167-2174.
- 16 27. McEvoy MD, Smalley JC, Nietert PJ, Field LC, Furse CM, Blenko JW, Cobb BG, Walters JL,
- 17 Pendarvis A, Dalal NS: Validation of a detailed scoring checklist for use during advanced cardiac
- 18 life support certification. *Simulation in healthcare: journal of the Society for Simulation in*
- 19 *Healthcare* 2012, 7:222.
- 20 28. Savoldelli GL, Naik VN, Hamstra SJ, Morgan PJ: Barriers to use of simulation-based education.
- 21 *Canadian Journal of Anesthesia* 2005, 52:944-950.
- 22
- 23
- 24
- 25
- 26
- 27
- 28
- 29
- 30
- 31
- 32
- 33
- 34
- 35
- 36
- 37
- 38
- 39
- 40
- 41
- 42
- 43
- 44
- 45
- 46
- 47
- 48
- 49
- 50
- 51
- 52
- 53
- 54
- 55
- 56
- 57
- 58
- 59
- 60



1  
2  
3  
4  
5  
6  
7  
8  
9  
10  
11  
12  
13  
14  
15  
16  
17  
18  
19  
20  
21  
22  
23  
24  
25  
26  
27  
28  
29  
30  
31  
32  
33  
34  
35  
36  
37  
38  
39  
40  
41  
42  
43  
44  
45  
46  
47  
48  
49  
50  
51  
52  
53  
54  
55  
56  
57  
58  
59  
60

**Figure 1: Study flow chart for participants consented and randomized to this study.**

For peer review only

1  
2  
3  
4  
5  
6  
7  
8  
9  
10  
11  
12  
13  
14  
15  
16  
17  
18  
19  
20  
21  
22  
23  
24  
25  
26  
27  
28  
29  
30  
31  
32  
33  
34  
35  
36  
37  
38  
39  
40  
41  
42  
43  
44  
45  
46  
47  
48  
49  
50  
51  
52  
53  
54  
55  
56  
57  
58  
59  
60

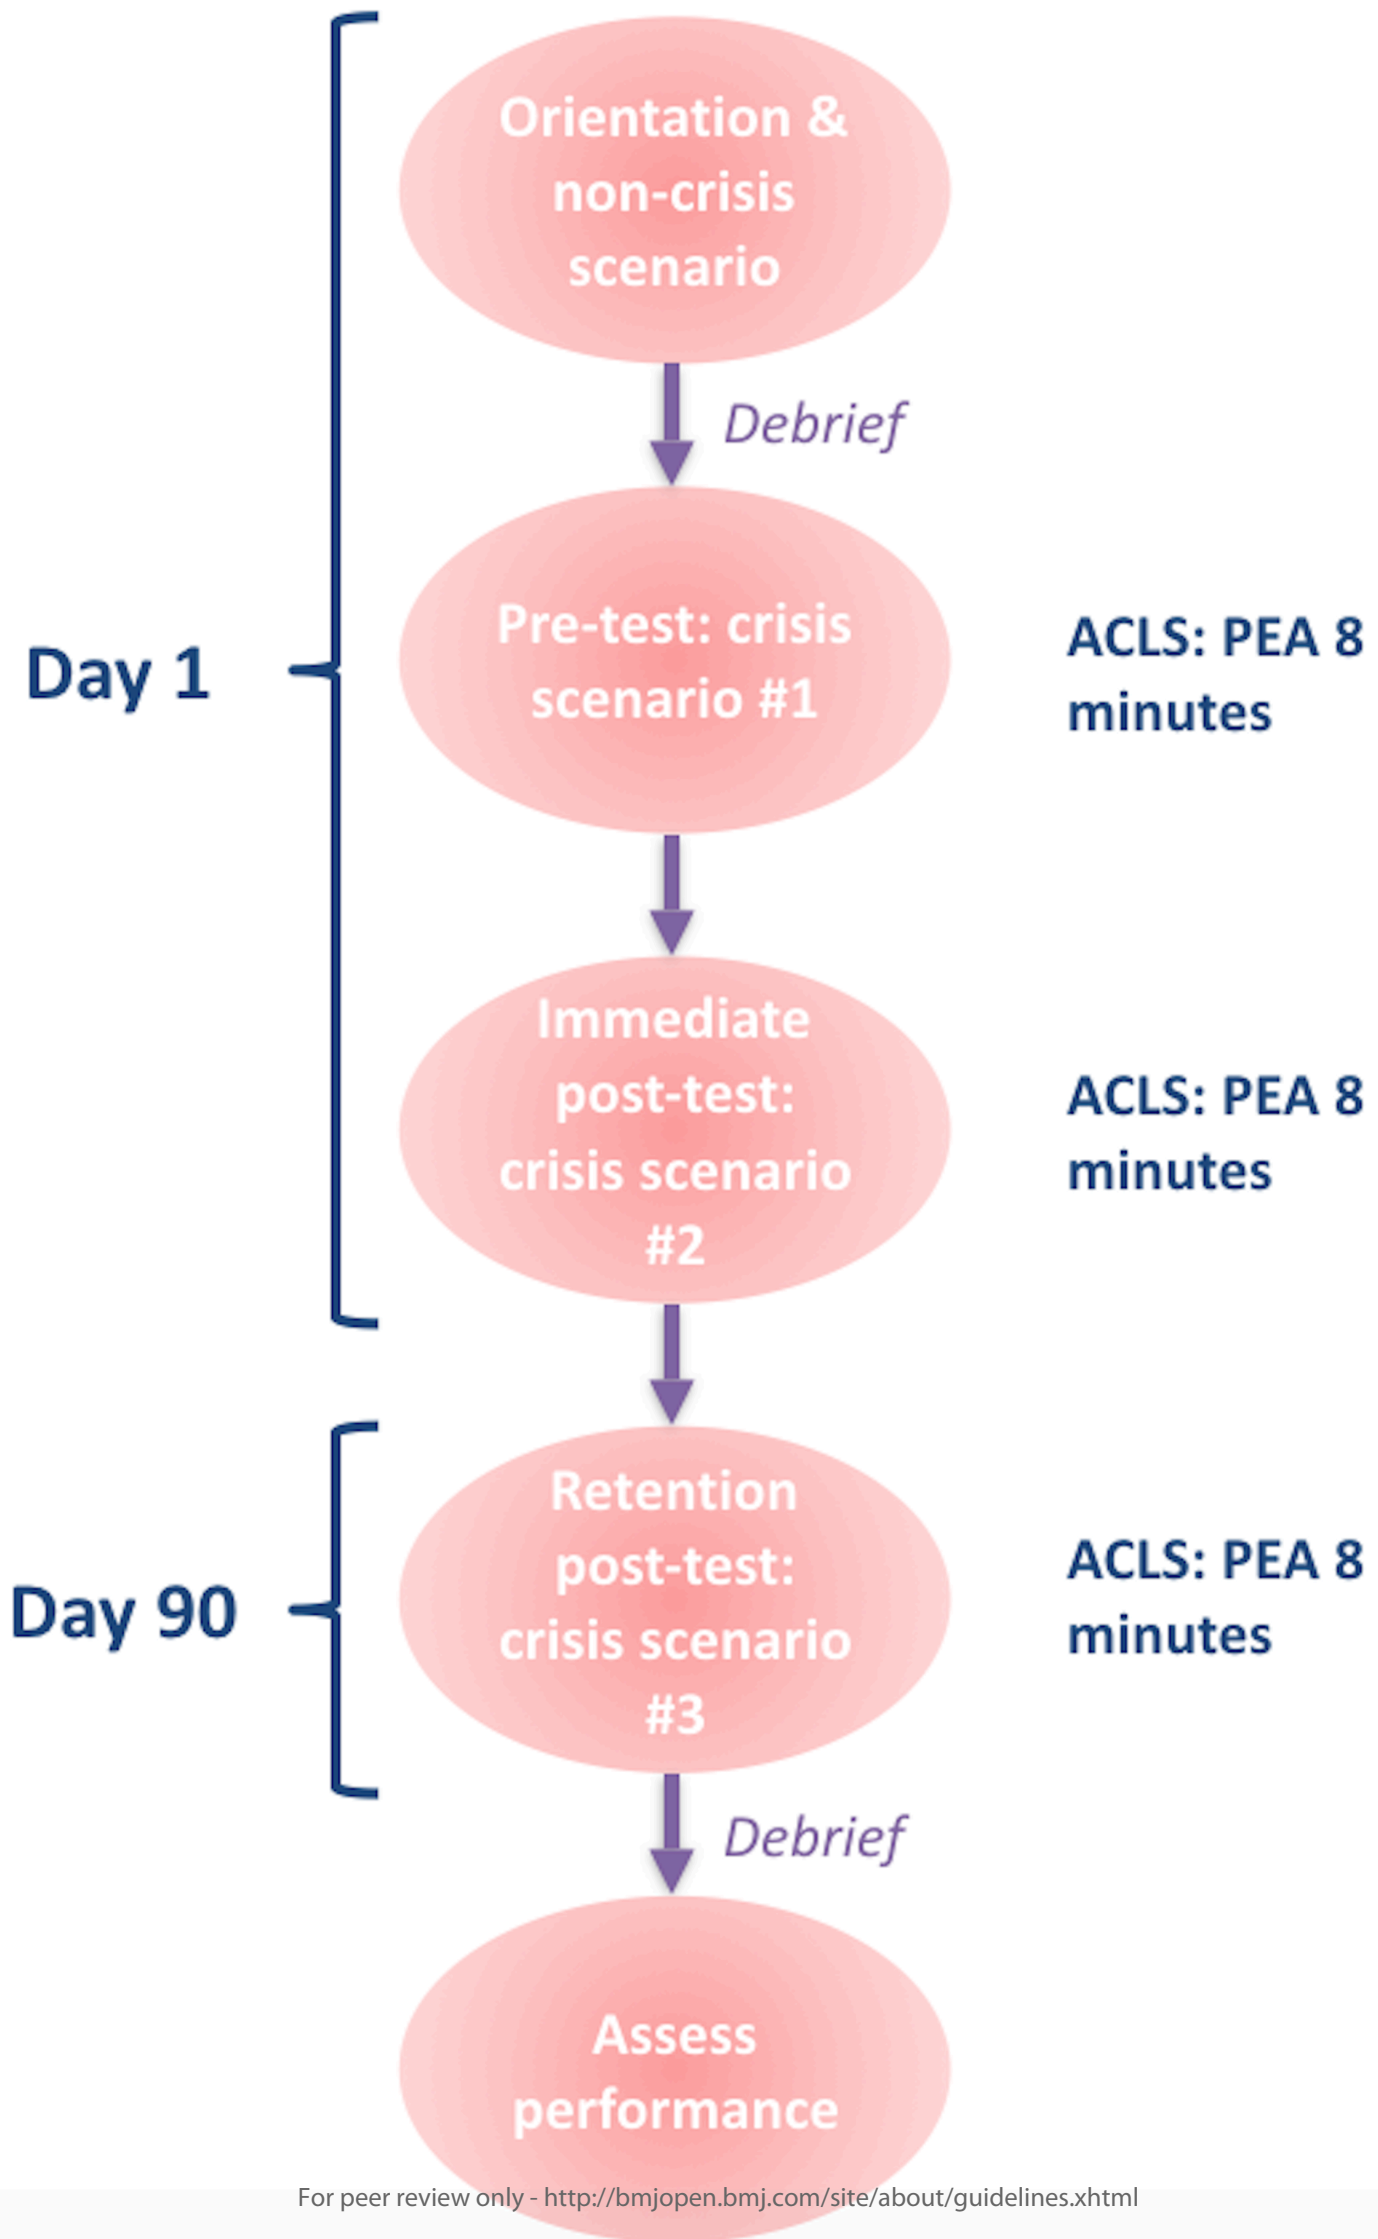

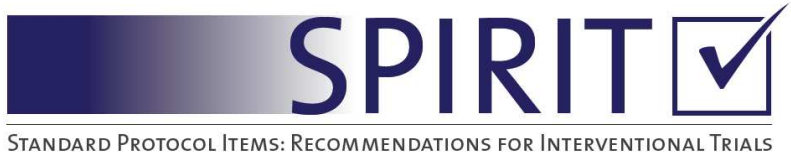

SPIRIT 2013 Checklist: Recommended items to address in a clinical trial protocol and related documents\*

| Section/item                      | Item No                                                                                                                                                                                                                                                          | Description                                                                                                                                                                                                                                                                              | Addressed on page number   |
|-----------------------------------|------------------------------------------------------------------------------------------------------------------------------------------------------------------------------------------------------------------------------------------------------------------|------------------------------------------------------------------------------------------------------------------------------------------------------------------------------------------------------------------------------------------------------------------------------------------|----------------------------|
| <b>Administrative information</b> |                                                                                                                                                                                                                                                                  |                                                                                                                                                                                                                                                                                          |                            |
| Title                             | 1                                                                                                                                                                                                                                                                | Descriptive title identifying the study design, population, interventions, and, if applicable, trial acronym                                                                                                                                                                             | ___ 1 ___                  |
| Trial registration                | 2a                                                                                                                                                                                                                                                               | Trial identifier and registry name. If not yet registered, name of intended registry                                                                                                                                                                                                     | ___ 3 ___                  |
|                                   | 2b                                                                                                                                                                                                                                                               | All items from the World Health Organization Trial Registration Data Set                                                                                                                                                                                                                 | See trial registration     |
| Protocol version                  | 3                                                                                                                                                                                                                                                                | Date and version identifier                                                                                                                                                                                                                                                              | See trial registration ___ |
| Funding                           | 4                                                                                                                                                                                                                                                                | Sources and types of financial, material, and other support                                                                                                                                                                                                                              | ___ 15 ___                 |
| Roles and responsibilities        | 5a                                                                                                                                                                                                                                                               | Names, affiliations, and roles of protocol contributors                                                                                                                                                                                                                                  | ___ 1 and 15 ___           |
|                                   | 5b                                                                                                                                                                                                                                                               | Name and contact information for the trial sponsor                                                                                                                                                                                                                                       | ___ N/A ___                |
|                                   | 5c                                                                                                                                                                                                                                                               | Role of study sponsor and funders, if any, in study design; collection, management, analysis, and interpretation of data; writing of the report; and the decision to submit the report for publication, including whether they will have ultimate authority over any of these activities | ___ 15 ___                 |
| 5d                                | Composition, roles, and responsibilities of the coordinating centre, steering committee, endpoint adjudication committee, data management team, and other individuals or groups overseeing the trial, if applicable (see Item 21a for data monitoring committee) | ___ 7-10 ___                                                                                                                                                                                                                                                                             |                            |

### Introduction

|                          |    |                                                                                                                                                                                                           |           |
|--------------------------|----|-----------------------------------------------------------------------------------------------------------------------------------------------------------------------------------------------------------|-----------|
| Background and rationale | 6a | Description of research question and justification for undertaking the trial, including summary of relevant studies (published and unpublished) examining benefits and harms for each intervention        | ___4-6___ |
|                          | 6b | Explanation for choice of comparators                                                                                                                                                                     | ___5___   |
| Objectives               | 7  | Specific objectives or hypotheses                                                                                                                                                                         | ___5___   |
| Trial design             | 8  | Description of trial design including type of trial (eg, parallel group, crossover, factorial, single group), allocation ratio, and framework (eg, superiority, equivalence, noninferiority, exploratory) | ___6___   |

### Methods: Participants, interventions, and outcomes

|                      |     |                                                                                                                                                                                                                                                                                                                                                                                |            |
|----------------------|-----|--------------------------------------------------------------------------------------------------------------------------------------------------------------------------------------------------------------------------------------------------------------------------------------------------------------------------------------------------------------------------------|------------|
| Study setting        | 9   | Description of study settings (eg, community clinic, academic hospital) and list of countries where data will be collected. Reference to where list of study sites can be obtained                                                                                                                                                                                             | ___7___    |
| Eligibility criteria | 10  | Inclusion and exclusion criteria for participants. If applicable, eligibility criteria for study centres and individuals who will perform the interventions (eg, surgeons, psychotherapists)                                                                                                                                                                                   | ___8___    |
| Interventions        | 11a | Interventions for each group with sufficient detail to allow replication, including how and when they will be administered                                                                                                                                                                                                                                                     | ___8-10___ |
|                      | 11b | Criteria for discontinuing or modifying allocated interventions for a given trial participant (eg, drug dose change in response to harms, participant request, or improving/worsening disease)                                                                                                                                                                                 | ___N/A___  |
|                      | 11c | Strategies to improve adherence to intervention protocols, and any procedures for monitoring adherence (eg, drug tablet return, laboratory tests)                                                                                                                                                                                                                              | ___N/A___  |
|                      | 11d | Relevant concomitant care and interventions that are permitted or prohibited during the trial                                                                                                                                                                                                                                                                                  | ___N/A___  |
| Outcomes             | 12  | Primary, secondary, and other outcomes, including the specific measurement variable (eg, systolic blood pressure), analysis metric (eg, change from baseline, final value, time to event), method of aggregation (eg, median, proportion), and time point for each outcome. Explanation of the clinical relevance of chosen efficacy and harm outcomes is strongly recommended | ___10___   |
| Participant timeline | 13  | Time schedule of enrolment, interventions (including any run-ins and washouts), assessments, and visits for participants. A schematic diagram is highly recommended (see Figure)                                                                                                                                                                                               | ___19___   |

1  
2  
3  
4  
5  
6  
7  
8  
9  
10  
11  
12  
13  
14  
15  
16  
17  
18  
19  
20  
21  
22  
23  
24  
25  
26  
27  
28  
29  
30  
31  
32  
33  
34  
35  
36  
37  
38  
39  
40  
41  
42  
43  
44  
45  
46  
47

Sample size 14 Estimated number of participants needed to achieve study objectives and how it was determined, including clinical and statistical assumptions supporting any sample size calculations \_\_\_\_\_11\_\_\_\_\_

Recruitment 15 Strategies for achieving adequate participant enrolment to reach target sample size \_\_\_\_\_11\_\_\_\_\_

**Methods: Assignment of interventions (for controlled trials)**

Allocation:

Sequence generation 16a Method of generating the allocation sequence (eg, computer-generated random numbers), and list of any factors for stratification. To reduce predictability of a random sequence, details of any planned restriction (eg, blocking) should be provided in a separate document that is unavailable to those who enrol participants or assign interventions \_\_\_\_\_8\_\_\_\_\_

Allocation concealment mechanism 16b Mechanism of implementing the allocation sequence (eg, central telephone; sequentially numbered, opaque, sealed envelopes), describing any steps to conceal the sequence until interventions are assigned \_\_\_\_\_N/A\_\_\_\_\_

Implementation 16c Who will generate the allocation sequence, who will enrol participants, and who will assign participants to interventions \_\_\_\_\_8\_\_\_\_\_

Blinding (masking) 17a Who will be blinded after assignment to interventions (eg, trial participants, care providers, outcome assessors, data analysts), and how \_\_\_\_\_8\_\_\_\_\_

17b If blinded, circumstances under which unblinding is permissible, and procedure for revealing a participant's allocated intervention during the trial \_\_\_\_\_8\_\_\_\_\_

**Methods: Data collection, management, and analysis**

Data collection methods 18a Plans for assessment and collection of outcome, baseline, and other trial data, including any related processes to promote data quality (eg, duplicate measurements, training of assessors) and a description of study instruments (eg, questionnaires, laboratory tests) along with their reliability and validity, if known. Reference to where data collection forms can be found, if not in the protocol \_\_\_\_\_8-10\_\_\_\_\_

18b Plans to promote participant retention and complete follow-up, including list of any outcome data to be collected for participants who discontinue or deviate from intervention protocols \_\_\_\_\_N/A\_\_\_\_\_

|    |                     |     |                                                                                                                                                                                                                                                                   |             |
|----|---------------------|-----|-------------------------------------------------------------------------------------------------------------------------------------------------------------------------------------------------------------------------------------------------------------------|-------------|
| 1  |                     |     |                                                                                                                                                                                                                                                                   |             |
| 2  |                     |     |                                                                                                                                                                                                                                                                   |             |
| 3  | Data management     | 19  | Plans for data entry, coding, security, and storage, including any related processes to promote data quality (eg, double data entry; range checks for data values). Reference to where details of data management procedures can be found, if not in the protocol | ___9-11___  |
| 4  |                     |     |                                                                                                                                                                                                                                                                   |             |
| 5  |                     |     |                                                                                                                                                                                                                                                                   |             |
| 6  |                     |     |                                                                                                                                                                                                                                                                   |             |
| 7  | Statistical methods | 20a | Statistical methods for analysing primary and secondary outcomes. Reference to where other details of the statistical analysis plan can be found, if not in the protocol                                                                                          | ___10-11___ |
| 8  |                     |     |                                                                                                                                                                                                                                                                   |             |
| 9  |                     |     |                                                                                                                                                                                                                                                                   |             |
| 10 |                     | 20b | Methods for any additional analyses (eg, subgroup and adjusted analyses)                                                                                                                                                                                          | ___10-11___ |
| 11 |                     |     |                                                                                                                                                                                                                                                                   |             |
| 12 |                     | 20c | Definition of analysis population relating to protocol non-adherence (eg, as randomised analysis), and any statistical methods to handle missing data (eg, multiple imputation)                                                                                   | ___10___    |
| 13 |                     |     |                                                                                                                                                                                                                                                                   |             |
| 14 |                     |     |                                                                                                                                                                                                                                                                   |             |

### 15 **Methods: Monitoring**

|    |                 |     |                                                                                                                                                                                                                                                                                                                                       |           |
|----|-----------------|-----|---------------------------------------------------------------------------------------------------------------------------------------------------------------------------------------------------------------------------------------------------------------------------------------------------------------------------------------|-----------|
| 16 |                 |     |                                                                                                                                                                                                                                                                                                                                       |           |
| 17 | Data monitoring | 21a | Composition of data monitoring committee (DMC); summary of its role and reporting structure; statement of whether it is independent from the sponsor and competing interests; and reference to where further details about its charter can be found, if not in the protocol. Alternatively, an explanation of why a DMC is not needed | ___N/A___ |
| 18 |                 |     |                                                                                                                                                                                                                                                                                                                                       |           |
| 19 |                 |     |                                                                                                                                                                                                                                                                                                                                       |           |
| 20 |                 |     |                                                                                                                                                                                                                                                                                                                                       |           |
| 21 |                 |     |                                                                                                                                                                                                                                                                                                                                       |           |
| 22 |                 | 21b | Description of any interim analyses and stopping guidelines, including who will have access to these interim results and make the final decision to terminate the trial                                                                                                                                                               | ___N/A___ |
| 23 |                 |     |                                                                                                                                                                                                                                                                                                                                       |           |
| 24 |                 |     |                                                                                                                                                                                                                                                                                                                                       |           |
| 25 | Harms           | 22  | Plans for collecting, assessing, reporting, and managing solicited and spontaneously reported adverse events and other unintended effects of trial interventions or trial conduct                                                                                                                                                     | ___N/A___ |
| 26 |                 |     |                                                                                                                                                                                                                                                                                                                                       |           |
| 27 |                 |     |                                                                                                                                                                                                                                                                                                                                       |           |
| 28 | Auditing        | 23  | Frequency and procedures for auditing trial conduct, if any, and whether the process will be independent from investigators and the sponsor                                                                                                                                                                                           | ___N/A___ |
| 29 |                 |     |                                                                                                                                                                                                                                                                                                                                       |           |
| 30 |                 |     |                                                                                                                                                                                                                                                                                                                                       |           |
| 31 |                 |     |                                                                                                                                                                                                                                                                                                                                       |           |

### 32 **Ethics and dissemination**

|    |                          |    |                                                                                                                                                                                                                                  |           |
|----|--------------------------|----|----------------------------------------------------------------------------------------------------------------------------------------------------------------------------------------------------------------------------------|-----------|
| 33 |                          |    |                                                                                                                                                                                                                                  |           |
| 34 | Research ethics approval | 24 | Plans for seeking research ethics committee/institutional review board (REC/IRB) approval                                                                                                                                        | ___7-8___ |
| 35 |                          |    |                                                                                                                                                                                                                                  |           |
| 36 |                          |    |                                                                                                                                                                                                                                  |           |
| 37 | Protocol amendments      | 25 | Plans for communicating important protocol modifications (eg, changes to eligibility criteria, outcomes, analyses) to relevant parties (eg, investigators, REC/IRBs, trial participants, trial registries, journals, regulators) | ___7-8___ |
| 38 |                          |    |                                                                                                                                                                                                                                  |           |
| 39 |                          |    |                                                                                                                                                                                                                                  |           |
| 40 |                          |    |                                                                                                                                                                                                                                  |           |
| 41 |                          |    |                                                                                                                                                                                                                                  |           |
| 42 |                          |    |                                                                                                                                                                                                                                  |           |
| 43 |                          |    |                                                                                                                                                                                                                                  |           |
| 44 |                          |    |                                                                                                                                                                                                                                  |           |

|    |                               |     |                                                                                                                                                                                                                                                                                     |       |
|----|-------------------------------|-----|-------------------------------------------------------------------------------------------------------------------------------------------------------------------------------------------------------------------------------------------------------------------------------------|-------|
| 1  |                               |     |                                                                                                                                                                                                                                                                                     |       |
| 2  |                               |     |                                                                                                                                                                                                                                                                                     |       |
| 3  | Consent or assent             | 26a | Who will obtain informed consent or assent from potential trial participants or authorised surrogates, and how (see Item 32)                                                                                                                                                        | 7-8   |
| 4  |                               |     |                                                                                                                                                                                                                                                                                     |       |
| 5  |                               |     |                                                                                                                                                                                                                                                                                     |       |
| 6  |                               | 26b | Additional consent provisions for collection and use of participant data and biological specimens in ancillary studies, if applicable                                                                                                                                               | N/A   |
| 7  |                               |     |                                                                                                                                                                                                                                                                                     |       |
| 8  | Confidentiality               | 27  | How personal information about potential and enrolled participants will be collected, shared, and maintained in order to protect confidentiality before, during, and after the trial                                                                                                | 8-9   |
| 9  |                               |     |                                                                                                                                                                                                                                                                                     |       |
| 10 |                               |     |                                                                                                                                                                                                                                                                                     |       |
| 11 | Declaration of interests      | 28  | Financial and other competing interests for principal investigators for the overall trial and each study site                                                                                                                                                                       | 14    |
| 12 |                               |     |                                                                                                                                                                                                                                                                                     |       |
| 13 |                               |     |                                                                                                                                                                                                                                                                                     |       |
| 14 | Access to data                | 29  | Statement of who will have access to the final trial dataset, and disclosure of contractual agreements that limit such access for investigators                                                                                                                                     | 14    |
| 15 |                               |     |                                                                                                                                                                                                                                                                                     |       |
| 16 |                               |     |                                                                                                                                                                                                                                                                                     |       |
| 17 | Ancillary and post-trial care | 30  | Provisions, if any, for ancillary and post-trial care, and for compensation to those who suffer harm from trial participation                                                                                                                                                       | N/A   |
| 18 |                               |     |                                                                                                                                                                                                                                                                                     |       |
| 19 |                               |     |                                                                                                                                                                                                                                                                                     |       |
| 20 | Dissemination policy          | 31a | Plans for investigators and sponsor to communicate trial results to participants, healthcare professionals, the public, and other relevant groups (eg, via publication, reporting in results databases, or other data sharing arrangements), including any publication restrictions | 12-13 |
| 21 |                               |     |                                                                                                                                                                                                                                                                                     |       |
| 22 |                               |     |                                                                                                                                                                                                                                                                                     |       |
| 23 |                               |     |                                                                                                                                                                                                                                                                                     |       |
| 24 |                               |     |                                                                                                                                                                                                                                                                                     |       |
| 25 |                               | 31b | Authorship eligibility guidelines and any intended use of professional writers                                                                                                                                                                                                      | 15    |
| 26 |                               |     |                                                                                                                                                                                                                                                                                     |       |
| 27 |                               | 31c | Plans, if any, for granting public access to the full protocol, participant-level dataset, and statistical code                                                                                                                                                                     | N/A   |
| 28 |                               |     |                                                                                                                                                                                                                                                                                     |       |
| 29 | <b>Appendices</b>             |     |                                                                                                                                                                                                                                                                                     |       |
| 30 |                               |     |                                                                                                                                                                                                                                                                                     |       |
| 31 | Informed consent materials    | 32  | Model consent form and other related documentation given to participants and authorised surrogates                                                                                                                                                                                  | 21-31 |
| 32 |                               |     |                                                                                                                                                                                                                                                                                     |       |
| 33 |                               |     |                                                                                                                                                                                                                                                                                     |       |
| 34 | Biological specimens          | 33  | Plans for collection, laboratory evaluation, and storage of biological specimens for genetic or molecular analysis in the current trial and for future use in ancillary studies, if applicable                                                                                      | N/A   |
| 35 |                               |     |                                                                                                                                                                                                                                                                                     |       |
| 36 |                               |     |                                                                                                                                                                                                                                                                                     |       |

37 \*It is strongly recommended that this checklist be read in conjunction with the SPIRIT 2013 Explanation & Elaboration for important clarification on the items.  
 38 Amendments to the protocol should be tracked and dated. The SPIRIT checklist is copyrighted by the SPIRIT Group under the Creative Commons  
 39 "[Attribution-NonCommercial-NoDerivs 3.0 Unported](https://creativecommons.org/licenses/by-nc-nd/3.0/)" license.  
 40

# BMJ Open

**Does the age of acute care physician's impact their 1) crisis management performance and 2) learning after simulation-based education? A protocol for a multicentre prospective cohort study in Toronto and Ottawa, Canada.**

|                                 |                                                                                                                                                                                                                                                                                                                                                                                                                                                                                                                                                                                                                                                                                                                                                                                                                                                                                                                                                                                                                                                                                                                                                                                                                         |
|---------------------------------|-------------------------------------------------------------------------------------------------------------------------------------------------------------------------------------------------------------------------------------------------------------------------------------------------------------------------------------------------------------------------------------------------------------------------------------------------------------------------------------------------------------------------------------------------------------------------------------------------------------------------------------------------------------------------------------------------------------------------------------------------------------------------------------------------------------------------------------------------------------------------------------------------------------------------------------------------------------------------------------------------------------------------------------------------------------------------------------------------------------------------------------------------------------------------------------------------------------------------|
| Journal:                        | <i>BMJ Open</i>                                                                                                                                                                                                                                                                                                                                                                                                                                                                                                                                                                                                                                                                                                                                                                                                                                                                                                                                                                                                                                                                                                                                                                                                         |
| Manuscript ID                   | bmjopen-2017-020940.R1                                                                                                                                                                                                                                                                                                                                                                                                                                                                                                                                                                                                                                                                                                                                                                                                                                                                                                                                                                                                                                                                                                                                                                                                  |
| Article Type:                   | Protocol                                                                                                                                                                                                                                                                                                                                                                                                                                                                                                                                                                                                                                                                                                                                                                                                                                                                                                                                                                                                                                                                                                                                                                                                                |
| Date Submitted by the Author:   | 09-Mar-2018                                                                                                                                                                                                                                                                                                                                                                                                                                                                                                                                                                                                                                                                                                                                                                                                                                                                                                                                                                                                                                                                                                                                                                                                             |
| Complete List of Authors:       | Alam, Fahad; University of Toronto Faculty of Medicine, Anesthesia<br>LeBlanc, Vicki; University of Ottawa, Department of Innovation in Medical Education<br>Baxter, Alan; University of Ottawa, Department of Anesthesiology and Pain Medicine<br>Tarshis, Jordan; University of Toronto, Department of Anesthesia<br>Piquette, Dominique; University of Toronto, Department of Critical Care Medicine<br>Gu, Yuqi; University of Ottawa, Department of Anesthesiology and Pain Medicine<br>Filipkowska, Caroline; University of Toronto, Department of Emergency Medicine<br>Krywenky, Ashley; University of Ottawa, Department of Emergency Medicine<br>Kester, Nicole; University of Toronto, Department of Emergency Medicine<br>Cardinal, Pierre; University of Ottawa, Department of Critical Care Medicine<br>Au, Shelly; Sunnybrook Health Sciences Centre, Department of Anesthesia<br>Lam, Sandy; University of Ottawa, Department of Anesthesiology and Pain Medicine<br>Boet, Sylvain; University of Ottawa, Department of Anesthesiology and Pain Medicine<br>Perioperative Anesthesia Clinical Trials Group , Perioperative Anesthesia Clinical Trials; University of Manitoba, Department of Anesthesia |
| <b>Primary Subject Heading</b>: | Medical education and training                                                                                                                                                                                                                                                                                                                                                                                                                                                                                                                                                                                                                                                                                                                                                                                                                                                                                                                                                                                                                                                                                                                                                                                          |
| Secondary Subject Heading:      | Medical management, Anaesthesia, Emergency medicine, Intensive care                                                                                                                                                                                                                                                                                                                                                                                                                                                                                                                                                                                                                                                                                                                                                                                                                                                                                                                                                                                                                                                                                                                                                     |
| Keywords:                       | Adult anaesthesia < ANAESTHETICS, MEDICAL EDUCATION & TRAINING, Adult intensive & critical care < INTENSIVE & CRITICAL CARE, EDUCATION & TRAINING (see Medical Education & Training)                                                                                                                                                                                                                                                                                                                                                                                                                                                                                                                                                                                                                                                                                                                                                                                                                                                                                                                                                                                                                                    |
|                                 |                                                                                                                                                                                                                                                                                                                                                                                                                                                                                                                                                                                                                                                                                                                                                                                                                                                                                                                                                                                                                                                                                                                                                                                                                         |

SCHOLARONE™  
Manuscripts



1  
2  
3  
4  
5  
6  
7  
8  
9  
10  
11  
12  
13  
14  
15  
16  
17  
18  
19  
20  
21  
22  
23  
24  
25  
26  
27  
28  
29  
30  
31  
32  
33  
34  
35  
36  
37  
38  
39  
40  
41  
42  
43  
44  
45  
46  
47  
48  
49  
50  
51  
52  
53  
54  
55  
56  
57  
58  
59  
60

For peer review only

## Title

Does the age of acute care physician's impact their 1) crisis management performance and 2) learning after simulation-based education? A protocol for a multicentre prospective cohort study in Toronto and Ottawa, Canada.

## Authors

Fahad Alam ([Fahad.alam@sunnybrook.ca](mailto:Fahad.alam@sunnybrook.ca))<sup>1</sup>, Vicki R LeBlanc ([vleblan3@uottawa.ca](mailto:vleblan3@uottawa.ca))<sup>2</sup>, Alan Baxter ([abaxter@ottawahospital.on.ca](mailto:abaxter@ottawahospital.on.ca))<sup>3</sup>, Jordan Tarshis ([Jordan.tarshis@sunnybrook.ca](mailto:Jordan.tarshis@sunnybrook.ca))<sup>1</sup>, Dominique Piquette ([Dominique.piquette@sunnybrook.ca](mailto:Dominique.piquette@sunnybrook.ca))<sup>4</sup>, Yuqi Gu ([GuY@Dal.Ca](mailto:GuY@Dal.Ca))<sup>3</sup>, Caroline Filipkowska ([caroline.filipkowska@sunnybrook.ca](mailto:caroline.filipkowska@sunnybrook.ca))<sup>5</sup>, Ashley Krywenky ([akrywenky@toh.ca](mailto:akrywenky@toh.ca))<sup>6</sup>, Nicole Kester-Greene ([nicole.kester@me.com](mailto:nicole.kester@me.com))<sup>5</sup>, Pierre Cardinal ([PCARDINAL@toh.ca](mailto:PCARDINAL@toh.ca))<sup>7</sup>, Shelly Au ([shelly.au@sunnybrook.ca](mailto:shelly.au@sunnybrook.ca))<sup>1</sup>, Sandy Lam ([salam@toh.ca](mailto:salam@toh.ca))<sup>3</sup>, Sylvain Boet ([sboet@toh.on.ca](mailto:sboet@toh.on.ca))<sup>2, 3</sup>; and Perioperative Anesthesia Clinical Trials Group ([canadianpact@gmail.com](mailto:canadianpact@gmail.com))<sup>8,\*</sup>

1. Department of Anesthesia, Sunnybrook Health Sciences Centre, University of Toronto, Toronto, ON
2. Department of Innovation in Medical Education and University of Ottawa Skills and Simulation Centre, The Ottawa Hospital, University of Ottawa, Ottawa, ON
3. Department of Anesthesiology and Pain Medicine, The Ottawa Hospital, University of Ottawa, Ottawa, ON
4. Department of Critical Care Medicine, Sunnybrook Health Sciences Centre, University of Toronto, Toronto, ON
5. Department of Emergency Medicine, Sunnybrook Health Sciences Centre, University of Toronto, Toronto, ON
6. Department of Emergency Medicine, The Ottawa Hospital, University of Ottawa, Ottawa, ON
7. Department of Critical Care Medicine, The Ottawa Hospital, Ottawa, ON

1  
2  
3  
4 8. Department of Anesthesia, University of Manitoba, Winnipeg, MB  
5

6  
7 \* Current members of the Perioperative Anesthesia Clinical Trials Group (see  
8 acknowledgement section)  
9

10  
11 **Word Count (excluding tables, figures, references): 2596**  
12

13  
14  
15  
16 **Number of Tables/Figures:** 1 Table, 1 Figure  
17

18  
19  
20 **Corresponding Author**  
21

22 Fahad Alam  
23

24  
25 Department of Anesthesia, Sunnybrook Health Sciences Centre  
26

27 2075 Bayview Ave, Room M3-200, Toronto, Ontario, Canada, M4N 3M5  
28

29  
30 Tel (+1) 416-480-4864; Fax (+1) 416-480-6039; E-mail: [fahad.alam@sunnybrook.ca](mailto:fahad.alam@sunnybrook.ca)  
31

32  
33  
34 **Keywords (3-10 words):**  
35

36 Ageing; Continuing Education and Training; Patient Safety; Randomized Controlled Trial;  
37

38  
39 Simulation Education  
40  
41  
42  
43  
44  
45  
46  
47  
48  
49  
50  
51  
52  
53  
54  
55  
56  
57  
58  
59  
60

## Abstract

**Introduction:** The proportion of older acute care physicians (ACPs) has been steadily increasing. Ageing is associated with physiological changes and prospective research investigating how such age-related physiological changes affect clinical performance, including crisis resource management (CRM) skills, is lacking. There is a gap in the literature on whether physician's age influences baseline CRM performance and also learning from simulation. We aim to investigate whether ageing is associated with baseline CRM skills of ACPs (emergency, critical care, anesthesia) using simulated crisis scenarios and to assess whether ageing influences learning from simulation-based education.

**Methods and Analysis:** This is a prospective cohort multicenter study recruiting ACPs from the Universities of Toronto and Ottawa, Canada. Each participant will manage an Advanced Cardiovascular Life Support (ACLS) crisis simulated scenario (pre-test) and then be debriefed on their CRM skills. They will then manage another simulated crisis scenario (immediate post-test). Three months after, participants will return to manage a third simulated crisis scenario (retention post-test). The relationship between biological age and chronological age will be assessed by measuring the participants CRM skills and their ability to learn from high-fidelity simulation.

**Ethics and Dissemination:** This protocol was approved by Sunnybrook Health Sciences Centre Research Ethics Board (REB Number 140-2015) and the Ottawa Health Science Network Research Ethics Board (#20150173-01H). The results will be disseminated in a peer reviewed journal, and at scientific meetings.

**Trial Registration:** NCT02683447; Pre-results

**Strengths and Limitations of the Study:**

- Acute care physicians are recruited from various institutions across Ontario from three specialties
- Participants are immediately debriefed by experts on their crisis resource management performance
- Simulation environment for each scenario is tailored to the participant's specialty
- Ageing physicians likely did not train with mannequin-based simulation compared to physicians who recently completed their certification

For peer review only

## Introduction

The proportion of older acute care physicians (ACPs) has been steadily increasing.[1] Within Canada, approximately 32% - 40% of anesthesiologists, emergency and critical care physicians are over the age of 55. A survey of members of the American Society of Anesthesiologists in 2013 revealed that a greater percentage of members are older (>55) in 2013 compared to 2007.[2] The shift in workforce demographics may be explained by several factors such as the recent economic crisis, which has forced some physicians to choose to delay retirement. Furthermore, the reduction in the number of residency positions in the early 1990s led to a smaller proportion of middle aged ACPs.[3-4] Thus, with an overall shortage of healthcare providers, this has led to a greater proportion of older ACPs delaying retirement in order to meet the demands of the healthcare system.

Acute care specialties such as critical care, emergency medicine and anesthesiology, require providers to excel at both technical and non-technical skills (e.g. teamwork, communication and leadership) and function at a high cognitive level in a fast-paced environment that requires quick decision-making and problem solving. Ageing is associated with physiological changes, which in turn can influence both a physician's clinical and decision-making abilities. The time required for processing information is prolonged and decision-making can be compromised in physicians as they age.[5-8] Physiological stress impacts the ageing physician to a great extent (compared to their younger cohort) with potential consequences on performance. The prevalence of stress, illness, fatigue, and dementia increases as one ages.[3, 5-7, 9] Manual dexterity can also be affected with the onset of arthritis and alterations in visual acuity.[3, 10] Siu and colleagues found that anesthesiologist's age and years from residency were associated with decreased simulated cricothyroidotomy proficiency.[5, 11]

1  
2  
3 Research investigating how such ageing-related physiological changes affect clinical  
4 performance and patient safety is limited.[10, 12] The common idea that ageing physicians  
5 compensate through experience and pattern recognition from previous similar clinical  
6 situations[8, 11] has been called into question. First, physiological studies have shown that  
7 neural compensation mechanisms to ageing are limited and cannot prevent a certain amount of  
8 cognitive decline in the long-term.[13] Secondly, Duclos *et al.* found that older surgeons had an  
9 increased rate of patient complications after thyroid surgery.[14] In addition, 10 years of  
10 litigation data shows that anesthesiologists in British Columbia, Ontario, and Quebec who are  
11 older than 65 have 1.5 times the risk of being involved in litigation compared with those aged  
12 less than 51, with the settlements being generally larger.[10-11] For all specialties, disciplinary  
13 incidents involving physicians are likely to occur later in practice, increasing with each 10-year  
14 interval since first getting a license.[8, 12, 15] Moreover, the degree of injury identified in the  
15 claims of physicians 65 years of age or older was of greater severity.[8] Lastly, studies have  
16 shown that long term medical knowledge retention can be negatively impacted with increasing  
17 age as well [16]. Overall, human physiology, previous investigations, litigation, disciplinary and  
18 critical event data strongly suggests that ageing effects among physicians are not compensated  
19 by greater experience as previously thought.

20  
21  
22  
23  
24  
25  
26  
27  
28  
29  
30  
31  
32  
33  
34  
35  
36  
37  
38  
39  
40  
41  
42 Crisis Resource Management (CRM) skills are essential clinical skills within acute care  
43 specialties, and are vital for patient safety. CRM encompasses technical skills (e.g. defibrillation,  
44 drug preparation, intubation), as well as a rapid and structured approach to non-technical,  
45 cognitive skills such as decision-making, task management, situational awareness and team  
46 management. CRM skills are crucial during life threatening crises and are precisely the  
47  
48  
49  
50  
51  
52  
53  
54  
55  
56  
57  
58  
59  
60

1  
2  
3 type of processing and decision-making skills that may decline as one ages, thus contributing to  
4  
5 patient safety concerns described above.  
6

7  
8 Evidence shows that high-fidelity simulation-based education is effective for learning  
9  
10 CRM, transferring skills to the clinical setting, and improving patient outcomes.[17] However,  
11  
12 the effectiveness of simulation-based education for teaching CRM has mainly focused on  
13  
14 undergraduate and post-graduate learners, whereas limited data is available for the ageing  
15  
16 physician population.[18] Despite the limited evidence to support claims that simulation for  
17  
18 continuing professional development actually improves learning,[19] simulation-based  
19  
20 education has been recommended as a tool to train and assess ACPs.[10, 20] Thus, there is a  
21  
22 need to investigate if physicians' age influences baseline CRM performance or learning from  
23  
24 simulation-based education.  
25  
26  
27  
28  
29  
30  
31  
32  
33  
34  
35  
36  
37  
38  
39  
40  
41  
42  
43  
44  
45  
46  
47  
48  
49  
50  
51  
52  
53  
54  
55  
56  
57  
58  
59  
60



## Methods and Analysis

### *Aim:*

Our research aims are to investigate whether ageing impacts CRM skills in acute care physicians and to determine whether ageing influences CRM skill learning from high fidelity simulation and debriefing.

We hypothesize that ACPs' baseline CRM performance as assessed using high-fidelity, simulation-based scenarios decline as physician age increase. Our secondary hypothesis is that although ACPs' CRM performance will increase immediately following simulation-based practice scenarios with feedback, increasing physician age will negatively impact the retention of CRM skills.

### *Design:*

This study is a prospective cohort multicenter interventional study. This study has been registered on **ClinicalTrials.gov** (NCT02683447) and this manuscript follows the SPIRIT (Standard Protocol Items: Recommendations for Interventional Trials) reporting guidelines.[21]

### *Ethics:*

This study will recruit from two large university-affiliated tertiary centres in Toronto and Ottawa, Canada. Ethical approval was received from the Ottawa Health Science Network Research Ethics Board (#20150173-01H) (Ottawa, ON) and the Sunnybrook Health Sciences Centre, Research Ethics and Human Research Protections Program (#140-2015) (Toronto, ON). Written informed consent and a confidentiality agreement will be obtained from all participants by a trained research assistant or a study investigator. ACPs from the academic affiliated sites of

1  
2  
3 both universities will be approached for recruitment, with data collection being conducted locally  
4  
5 in each center. Throughout the study and upon completion of the study, all data will be stored on  
6  
7 secure servers at each sites institution. Data will be transferred using secure, encrypted, protected  
8  
9 file transfer software.  
10

#### 11 12 13 14 15 *Participant Characteristics:*

16  
17 All practicing emergency, critical care and anesthesia staff with a minimum of 5 years of  
18  
19 clinical practice post-certification will be approached for participation. Participants will not be  
20  
21 scheduled for a study session on a post-call day. Participants will receive email advertisements  
22  
23 for voluntary participation in the study and all eligible physicians will be recruited from both  
24  
25 academic and community sites. In Toronto, a formal simulation training curriculum for faculty  
26  
27 does not exist. In Ottawa, a curriculum is in development and is in its infancy when it comes to  
28  
29 implementation.  
30  
31  
32  
33  
34

#### 35 36 37 *Simulation Scenario Development:*

38 The core concepts pertaining to CRM skills and subsequent management of pulseless  
39  
40 electrical activity (PEA) arrest will be consolidated into one document by the principal  
41  
42 investigators (FA and SB) and then sent out to three faculty acute care physicians (one from each  
43  
44 specialty involved) from Universities not involved in the recruitment, who are trained advanced  
45  
46 cardiovascular life support (ACLS) instructors, for review and revisions. Once core concepts are  
47  
48 agreed upon, the three simulation scenarios will be developed. The simulation environment for  
49  
50 each scenario will be tailored to their respective specialty (i.e. Intensive Care Unit, Operating  
51  
52 Room, and Emergency Room). Each scenario will be adapted in terms of environment  
53  
54  
55  
56  
57

1  
2  
3 (layout/equipment) and appropriate background noise (overhead announcements, monitor noise)  
4  
5 for the participant's specialty to ensure psychological and environmental/technical fidelity. Each  
6  
7 scenario will then be piloted before recruitment to ensure an equal degree of difficulty and  
8  
9 appropriate fidelity.  
10  
11  
12  
13

#### 14 *Data Collection:*

15  
16  
17 Research personnel at Sunnybrook Health Sciences Centre will generate computer-based  
18  
19 randomization of scenarios for all participants. Study participants will be blinded to their  
20  
21 randomization assignment and un-blinding will not occur. The simulation environment for each  
22  
23 scenario will be tailored to their respective specialty (i.e. Intensive Care Unit, Operating Room,  
24  
25 and Emergency Room). Scenarios will be designed by an interdisciplinary group and will be  
26  
27 piloted before recruitment to ensure an equal degree of difficulty. It will consist of a unique  
28  
29 inciting event and will result in PEA arrests.  
30  
31  
32

33 An overview of the study visits for all participants are shown in Figure 1, and detailed  
34  
35 assessments for each visit are listed in Table 1. On day one, participants will complete a  
36  
37 demographic questionnaire to *quantify potential confounding factors*, such as previous  
38  
39 simulation, ACLS and crisis management experience and a life expectancy questionnaire online  
40  
41 to determine subject's biological versus chronological age ([www.projectbiglife.ca](http://www.projectbiglife.ca)). Depending  
42  
43 on certain lifestyle factors, a person might have a 'younger or older' biological age when  
44  
45 compared to their stated chronological age.[22] Next, a standardized structured orientation  
46  
47 session will be held for each participant, including a non-crisis simulated scenario for  
48  
49 familiarization with the simulation environment/equipment in which the study scenarios will take  
50  
51  
52  
53  
54  
55  
56  
57  
58  
59  
60

1  
2  
3 place. The scenario will be an induction of general anesthesia using rapid sequence induction (a  
4  
5 common technique performed by all three acute care specialties in this study).  
6

7  
8 Participants will manage three distinct scenarios for this study. All three scenarios will  
9  
10 be matched for difficulty. The first will be a PEA arrest scenario (pre-test), followed by a 20  
11  
12 minute facilitator-led debrief on their CRM performance. They will then manage another PEA  
13  
14 crisis scenario (immediate post-test). Three months later, participants will return and manage a  
15  
16 third PEA arrest scenario (retention post-test) in addition to a questionnaire to assess whether  
17  
18 they have recently completed ACLS training. The retention post-test can be completed starting  
19  
20 at 3 months (up to 6 months) following the initial pre-test. These scenarios will all be video-  
21  
22 recorded and all data will be stored on encrypted devices in compliance with local privacy  
23  
24 policies, at each institution. Following a pre-written standard script, confederates (trained  
25  
26 actors with healthcare backgrounds) will serve as a respiratory technician and nurse to be  
27  
28 directed by the participant, but they will not provide tips or guidance in terms of how to manage  
29  
30 the crisis. Two raters who have not worked with the participants, blinded to the study  
31  
32 hypotheses and test phase will evaluate the participant's performance using validated assessment  
33  
34 tools stated below.  
35  
36  
37  
38

#### 39 40 *Debrief*

41  
42 All facilitators will be experienced in debrief and CRM training. Despite this, the  
43  
44 facilitators will be trained on the outcome measures and will have the opportunity to debrief  
45  
46 the participants in the pilot scenarios prior to the recruitment of study participants. Debrief  
47  
48 will be led using the standardised ACLS algorithms and non-technical skills measured by  
49  
50 the outcome assessment tools.  
51  
52

#### 53 54 *Performance Measures:*

1  
2  
3 The Ottawa Global Rating Scale (GRS) is a tool that has shown validity and reliability  
4 evidence for measuring non-technical CRM skills.[23] It assesses each of the following  
5 categories on a 7-point anchored scale: situational awareness, leadership, problem solving,  
6 communication, resource utilization and overall performance.  
7  
8  
9  
10

11  
12 A simple checklist that has been shown to be a reliable tool for PEA arrest published  
13 by the Heart and Stroke Foundation will be used to assess for adherence to ACLS algorithm  
14 (technical skills) in addition to the quality of cardiopulmonary resuscitation.[24] Within each  
15 category, the participant gets a dichotomous option (“yes” or ‘no’) for each item required and  
16 the final score will be determined by tallying up the “yes” scores.  
17  
18  
19  
20  
21  
22  
23

#### 24 25 26 *Outcome measures:*

27  
28 We will assess the relationship of biological and chronological age with:  
29

- 30 • CRM skills (Primary Outcome), as measured by the total Ottawa GRS[23] score and the  
31 Heart and Stroke ACLS checklist for PEA.[24]  
32
- 33 • Learning from high-fidelity simulation education (Secondary Outcome), measured by  
34 change in performance *from pre-test, immediate post-test, and retention post-test* using  
35 the Ottawa GRS scale[23] and the ACLS checklist for PEA.[24]  
36  
37  
38  
39  
40  
41  
42  
43

#### 44 45 *Statistical Analysis:*

46  
47 Descriptive statistics will be calculated for all variables of interest. Continuous measures  
48 such as age will be summarized using means and standard deviations whereas categorical  
49 measures will be summarized using counts and percentages.  
50  
51  
52  
53  
54  
55  
56  
57

1  
2  
3 To test the first hypothesis, the association between CRM skills and age measured using  
4 the Ottawa GRS and ACLS checklist, we will use a Pearson correlation (or Spearman correlation  
5 for non-normal data). We will then conduct a multivariable linear regression model analysis  
6 including demographic variables of interest (i.e. past simulation experience, previous ACLS  
7 management) and time of retention test (i.e., between 3-6 months following initial post-test) as  
8 predictor variables. This model will also adjust for the correlation among observations taken  
9 from the same site.  
10  
11  
12  
13  
14  
15  
16  
17  
18

19 The secondary outcome of change in the Ottawa GRS and ACLS checklist score over  
20 time will be analyzed using a repeated measures analysis of variance (ANOVA), adjusting for  
21 the correlation among observations from the same participant. This analysis will be followed by  
22 specific pairwise comparisons: 1- pre-test (scenario 1) compared to immediate post-test (scenario  
23 2), and 2- immediate post-test (scenario 2) compared to retention post-test (scenario 3).  
24  
25  
26  
27  
28  
29  
30  
31  
32

### 33 *Sample Size Estimate:*

34  
35 Our primary analysis looks at the relationship between age and CRM skills. A sample of  
36 60 will provide 80% power at alpha of 0.05 to detect a correlation of 0.72 or greater (a high  
37 correlation) compared to a null hypothesis value of 0.5 (a moderate correlation). The sample size  
38 calculation was carried out using PASS Version 12 (Hintze, J. (2014). NCSS, LLC. Kaysville,  
39 Utah).  
40  
41  
42  
43  
44  
45  
46  
47  
48

### 49 *Patient Involvement:*

1  
2  
3 Patients were not involved in the development of the research question and outcome  
4  
5 measures. Study participants are physician, therefore patients were not approached for  
6  
7 participation.  
8  
9

## 10 11 12 **Ethics and Dissemination** 13

14 This study will explore the relationship between ageing with CRM performance and  
15 learning in a simulated clinical setting. As such, the results will be a critical first step in  
16  
17 informing continuing professional development practices and be the foundation for future studies  
18  
19 investigating this medical population. Furthermore, no matter the outcome, the results of this  
20  
21 study will be part of the discussion in helping shape not only national policy regarding practice  
22  
23 assessment, but also help guide continuing professional development for ageing physicians.  
24  
25

26 This study aims to investigate whether ageing is correlated with baseline CRM skills in  
27  
28 ACPs and determine whether ageing influences the acquisition and retention of CRM skills from  
29  
30 theatre-based simulation and debriefing. If ageing does have an impact on CRM skills in  
31  
32 physicians, then methods can be implemented aimed at assessing and intervening through  
33  
34 continuing professional development earlier in a physician's career. Hopefully, this can prevent  
35  
36 potential negative patient outcomes. One such method could be through the use of simulation,  
37  
38 but this study will first delineate whether this method of instruction needs to be modified for  
39  
40 older more experienced clinicians. If they do not learn the same way as residents, and we are  
41  
42 delivering instruction based on research conducted with junior learners, then this may be  
43  
44 ineffective for older physicians. This study will help clarify this uncertainty.  
45  
46  
47  
48  
49  
50

51 The main challenge of this study is recruiting and scheduling physicians. Financial  
52  
53 compensation has been identified as a barrier for staff participation in simulation sessions.[25]  
54  
55  
56  
57

1  
2  
3 To mitigate this, we include continuing professional development section 3 credits for all  
4 participants in order to facilitate recruitment, allowing participants to track and document their  
5 skills, knowledge and experience that is gained formally and informally as it is mandatory for all  
6 practicing physicians complete a required number of credits to maintain their status with the  
7 Royal College of Physicians and Surgeons of Canada. There also is potential for an unintentional  
8 recruitment bias since ageing physicians likely did not train with mannequin-based simulation.  
9  
10 To account for this, investigators will present at grand rounds with each acute care department to  
11 emphasize the implications of this study. Another challenge might be the concept of biological  
12 age vs. chronological age. This study will be using both chronological and biological age to  
13 mitigate this potential confounder.  
14  
15  
16  
17  
18  
19  
20  
21  
22  
23  
24  
25

26 Findings will be presented at local and national meetings (e.g., Canadian  
27 Anesthesiologists' Society Annual Meeting) and we plan to publish our study in a peer-reviewed  
28 journal as an open access article. Lastly, we intend to discuss findings at national specialty  
29 societies, interested provincial Colleges of Medicine and the Royal College of Physicians and  
30 Surgeons, with the goal of developing and implementing appropriate continuing education  
31 strategies for ACPs.  
32  
33  
34  
35  
36  
37  
38  
39

40 In conclusion, the results from this study will fill in the gap in the literature on whether  
41 physicians' age influences baseline CRM performance and also learning from simulation. The  
42 results will be a critical first step in helping shape and develop continuing education tailored to  
43 physicians' age.  
44  
45  
46  
47  
48  
49  
50  
51  
52  
53  
54  
55  
56  
57  
58  
59  
60



1  
2  
3 **List of Abbreviations**  
4

5 **ACLS**= Advance Cardiac Life Support  
6

7 **ACPs**= acute care physicians  
8

9  
10 **CRM** = crisis resource management  
11

12 **GRS**= Global Rating Scale  
13

14 **PEA**= pulseless electrical activity  
15  
16  
17  
18  
19  
20  
21  
22  
23  
24  
25  
26  
27  
28  
29  
30  
31  
32  
33  
34  
35  
36  
37  
38  
39  
40  
41  
42  
43  
44  
45  
46  
47  
48  
49  
50  
51  
52  
53  
54  
55  
56  
57  
58  
59  
60

For peer review only

## Acknowledgements

We would like to thank and acknowledge: Current members of the Perioperative Anesthesia Clinical Trials Group (Eric Jacobsohn (Chair) University of Manitoba; Scott Beattie, University of Toronto; André Denault, Université de Montréal; Ron George, Dalhousie University; Hilary Grocott, University of Manitoba; Richard Hall, Dalhousie University; Heather McDonald, University of Manitoba; Daniel I. McIsaac, University of Ottawa; C. David Mazer, University of Toronto; Manoj Lalu, University of Ottawa; Sonia Sampson, Memorial University; Alexis Turgeon, Université Laval; Homer Yang, University of Ottawa); Dr. Alex Kiss from Sunnybrook Research Institute for his insights on data analysis; Susan DeSousa for her assistance at the Sunnybrook Simulation Centre; Kathrina Flores and Jessica Pacquing for their role as confederates at Sunnybrook Health Sciences Centre.

**Author's contributions**

FA and SB contributed to secure research funding and conceived and designed all aspects of the study protocol. AB, VL, JT, DP, CF, NK-G, YG, AK, PC, SA and SL contributed to the study design. FA, SB, and SA drafted and finalized the manuscript. All authors have approved the final manuscript. This study has been endorsed by the Perioperative Anesthesia Clinical Trials Group.

For peer review only

## Funding

At the time of submission, this study has received two grants from (1) Phil R. Manning Research Award; Continuing Medical Education, the Society for Academic Continuing Medical Education; and (2) Department of Innovation in Medical Education, Education Healthcare Grant, University of Ottawa. Dr. Boet was supported by The Ottawa Hospital Anesthesia Alternate Funds Association. Funders have no role in the study design, data collection, management, analysis or interpretation of the data.

1  
2  
3  
4  
5  
6  
7  
8  
9  
10  
11  
12  
13  
14  
15  
16  
17  
18  
19  
20  
21  
22  
23  
24  
25  
26  
27  
28  
29  
30  
31  
32  
33  
34  
35  
36  
37  
38  
39  
40  
41  
42  
43  
44  
45  
46  
47  
48  
49  
50  
51  
52  
53  
54  
55  
56  
57  
58  
59  
60

**Competing Interests**

The authors have no conflicts of interest to declare.

For peer review only

**Table 1: Study visits**

|                                           | Visit -1 | Visit 0 | Visit 1 | Visit 2 | Visit 3 |
|-------------------------------------------|----------|---------|---------|---------|---------|
| <b>ENROLMENT:</b>                         |          |         |         |         |         |
| Eligibility screen                        | X        |         |         |         |         |
| Informed consent                          | X        |         |         |         |         |
| Allocation                                |          | X       |         |         |         |
| <b>INTERVENTIONS:</b>                     |          |         |         |         |         |
| Demographic questionnaire                 |          |         | X       |         |         |
| Life expectancy questionnaire             |          |         | X       |         |         |
| Orientation and non-crisis scenario       |          |         | X       |         |         |
| Pre-test                                  |          |         | X       |         |         |
| Debrief *                                 |          |         | X       | X       |         |
| Immediate post-test                       |          |         | X       |         |         |
| Retention post-test                       |          |         |         | X       |         |
| <b>ASSESSMENTS:</b>                       |          |         |         |         |         |
| Ottawa global rating scale **             |          |         |         |         | X       |
| Advance cardiac life support checklist ** |          |         |         |         | X       |

\* to be performed by experienced debriefers \*\*to be performed by two independent raters

## References

1. Information ClfH: Geographic Distribution of Physicians in Canada. 2005.
2. Colleges AoAM: Center for Workforce Studies: 2012 Physician Specialty Data Book. 2012.
3. Katz JD: Issues of concern for the aging anesthesiologist. *Anesthesia & Analgesia* 2001, 92:1487-1492.
4. Baird M, Daugherty L, Kumar KB, Arifkhanova A: The Anesthesiologist Workforce in 2013. 2014.
5. Durning SJ, Artino AR, Holmboe E, Beckman TJ, van der Vleuten C, Schuwirth L: Aging and cognitive performance: challenges and implications for physicians practicing in the 21st century. *Journal of Continuing Education in the Health Professions* 2010, 30:153-160.
6. Trunkey DD, Botney R: Assessing competency: a tale of two professions. *Journal of the American College of Surgeons* 2001, 192:385-395.
7. Turnbull J, Carbotte R, Hanna E, Norman G, Cunningham J, Ferguson B, Kaigas T: Cognitive difficulty in physicians. *Academic Medicine* 2000, 75:177-181.
8. Tessler MJ, Shrier I, Steele RJ: Association between anesthesiologist age and litigation. *Survey of Anesthesiology* 2012, 56:263-264.
9. Eva KW: The aging physician: changes in cognitive processing and their impact on medical practice. *Academic Medicine* 2002, 77:S1-S6.
10. Baxter AD, Boet S, Reid D, Skidmore G: The aging anesthesiologist: a narrative review and suggested strategies. *Canadian Journal of Anesthesia/Journal canadien d'anesthésie* 2014, 61:865-875.
11. Norman G, Young M, Brooks L: Non-analytical models of clinical reasoning: The role of experience. *Medical education* 2007, 41:1140-1145.
12. Alam A, Khan J, Liu J, Klemensberg J, Griesman J, Bell CM: Characteristics and rates of disciplinary findings amongst anesthesiologists by professional colleges in Canada. *Canadian Journal of Anesthesia/Journal canadien d'anesthésie* 2013, 60:1013-1019.
13. Hedden T, Gabrieli JD: Insights into the ageing mind: a view from cognitive neuroscience. *Nature reviews neuroscience* 2004, 5:87-96.
14. Duclos A, Peix J-L, Colin C, Kraimps J-L, Menegaux F, Pattou F, Sebag F, Touzet S, Bourdy S, Voirin N: Influence of experience on performance of individual surgeons in thyroid surgery: prospective cross sectional multicentre study. *BMJ* 2012, 344:d8041.
15. Khaliq AA, Dimassi H, Huang C-Y, Narine L, Smego RA: Disciplinary action against physicians: who is likely to get disciplined? *The American journal of medicine* 2005, 118:773-777.
16. Custers EJ, Ten Cate OT: Very long-term retention of basic science knowledge in doctors after graduation. *Med Educ* 2011, 45:422-430
17. Boet S, Bould MD, Fung L, Qosa H, Perrier L, Tavares W, Reeves S, Tricco AC: Transfer of learning and patient outcome in simulated crisis resource management: a systematic review. *Canadian Journal of Anesthesia/Journal canadien d'anesthésie* 2014, 61:571-582.
18. Marinopoulos SS, Dorman T, Ratanawongsa N, Wilson LM, Ashar BH, Magaziner JL, Miller RG, Thomas PA, Prokopowicz GP, Qayyum R: Effectiveness of continuing medical education. 2007.
19. Khanduja PK, Bould MD, Naik VN, Hladkovicz E, Boet S: The role of simulation in continuing medical education for acute care physicians: a systematic review\*. *Critical care medicine* 2015, 43:186-193.
20. Steadman RH: Improving on reality: can simulation facilitate practice change? *Anesthesiology* 2010, 112:775-776.
21. Chan A-W, Tetzlaff JM, Altman DG, Laupacis A, Gøtzsche PC, Krleža-Jerić K, Hróbjartsson A, Mann H, Dickersin K, Berlin JA: SPIRIT 2013 statement: defining standard protocol items for clinical trials. *Ann Intern Med* 2013, 158:200-207.

- 1
  - 2
  - 3
  - 4
  - 5
  - 6
  - 7
  - 8
  - 9
  - 10
  - 11
  - 12
  - 13
  - 14
  - 15
  - 16
  - 17
  - 18
  - 19
  - 20
  - 21
  - 22
  - 23
  - 24
  - 25
  - 26
  - 27
  - 28
  - 29
  - 30
  - 31
  - 32
  - 33
  - 34
  - 35
  - 36
  - 37
  - 38
  - 39
  - 40
  - 41
  - 42
  - 43
  - 44
  - 45
  - 46
  - 47
  - 48
  - 49
  - 50
  - 51
  - 52
  - 53
  - 54
  - 55
  - 56
  - 57
  - 58
  - 59
  - 60
22. Roizen MF: RealAge: Are you as young as you can be?: Harper Collins; 2010.
23. Kim J, Neilipovitz D, Cardinal P, Chiu M, Clinch J: A pilot study using high-fidelity simulation to formally evaluate performance in the resuscitation of critically ill patients: The University of Ottawa Critical Care Medicine, High-Fidelity Simulation, and Crisis Resource Management I Study. *Critical care medicine* 2006, 34:2167-2174.
24. McEvoy MD, Smalley JC, Nietert PJ, Field LC, Furse CM, Blenko JW, Cobb BG, Walters JL, Pendarvis A, Dalal NS: Validation of a detailed scoring checklist for use during advanced cardiac life support certification. *Simulation in healthcare: journal of the Society for Simulation in Healthcare* 2012, 7:222.
25. Savoldelli GL, Naik VN, Hamstra SJ, Morgan PJ: Barriers to use of simulation-based education. *Canadian Journal of Anesthesia* 2005, 52:944-950.



1  
2  
3  
4  
5  
6  
7  
8  
9  
10  
11  
12  
13  
14  
15  
16  
17  
18  
19  
20  
21  
22  
23  
24  
25  
26  
27  
28  
29  
30  
31  
32  
33  
34  
35  
36  
37  
38  
39  
40  
41  
42  
43  
44  
45  
46  
47  
48  
49  
50  
51  
52  
53  
54  
55  
56  
57  
58  
59  
60

**Figure 1: An overview of study visits for participants consented and randomized to this study.**

For peer review only

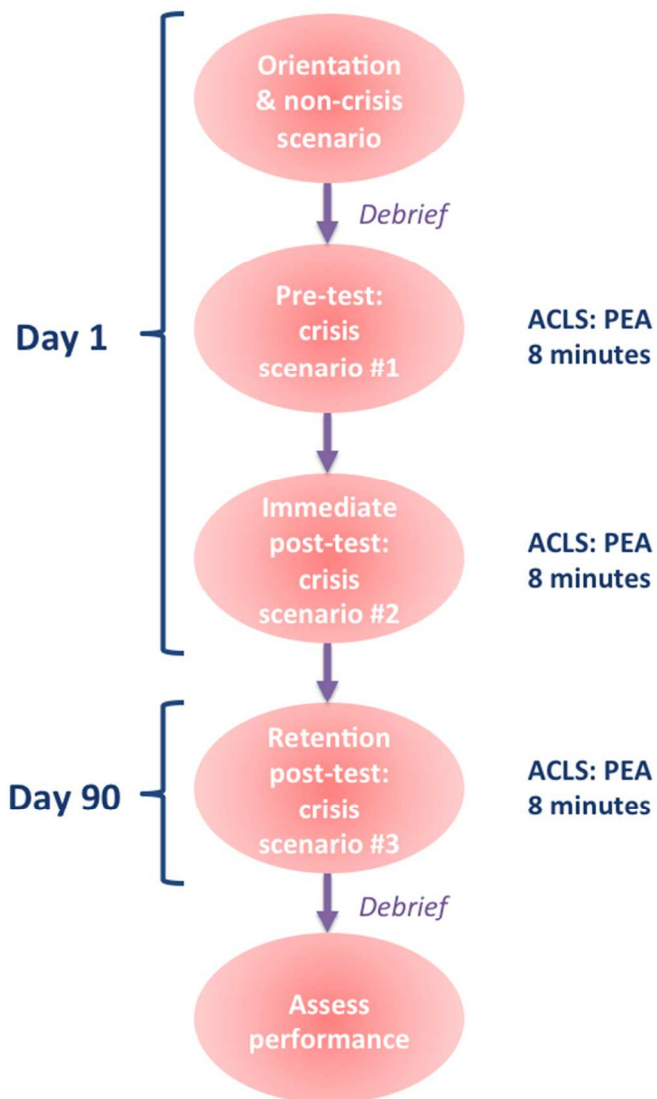

An overview of study visits for participants consented and randomized to this study.

60x81mm (300 x 300 DPI)

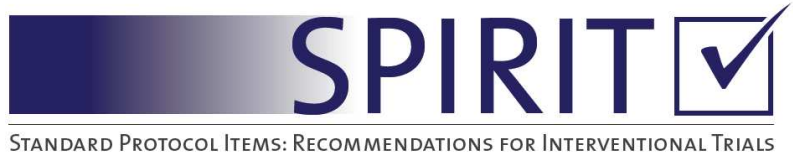

SPIRIT 2013 Checklist: Recommended items to address in a clinical trial protocol and related documents\*

| Section/item                      | Item No | Description                                                                                                                                                                                                                                                                              | Addressed on page number  |
|-----------------------------------|---------|------------------------------------------------------------------------------------------------------------------------------------------------------------------------------------------------------------------------------------------------------------------------------------------|---------------------------|
| <b>Administrative information</b> |         |                                                                                                                                                                                                                                                                                          |                           |
| Title                             | 1       | Descriptive title identifying the study design, population, interventions, and, if applicable, trial acronym                                                                                                                                                                             | ___1___                   |
| Trial registration                | 2a      | Trial identifier and registry name. If not yet registered, name of intended registry                                                                                                                                                                                                     | ___3___                   |
|                                   | 2b      | All items from the World Health Organization Trial Registration Data Set                                                                                                                                                                                                                 | See trial registration    |
| Protocol version                  | 3       | Date and version identifier                                                                                                                                                                                                                                                              | See trial registration___ |
| Funding                           | 4       | Sources and types of financial, material, and other support                                                                                                                                                                                                                              | ___15___                  |
| Roles and responsibilities        | 5a      | Names, affiliations, and roles of protocol contributors                                                                                                                                                                                                                                  | ___1 and 15___            |
|                                   | 5b      | Name and contact information for the trial sponsor                                                                                                                                                                                                                                       | ___N/A___                 |
|                                   | 5c      | Role of study sponsor and funders, if any, in study design; collection, management, analysis, and interpretation of data; writing of the report; and the decision to submit the report for publication, including whether they will have ultimate authority over any of these activities | ___15___                  |
|                                   | 5d      | Composition, roles, and responsibilities of the coordinating centre, steering committee, endpoint adjudication committee, data management team, and other individuals or groups overseeing the trial, if applicable (see Item 21a for data monitoring committee)                         | ___7-10___                |

### Introduction

|                          |    |                                                                                                                                                                                                           |     |
|--------------------------|----|-----------------------------------------------------------------------------------------------------------------------------------------------------------------------------------------------------------|-----|
| Background and rationale | 6a | Description of research question and justification for undertaking the trial, including summary of relevant studies (published and unpublished) examining benefits and harms for each intervention        | 4-6 |
|                          | 6b | Explanation for choice of comparators                                                                                                                                                                     | 5   |
| Objectives               | 7  | Specific objectives or hypotheses                                                                                                                                                                         | 5   |
| Trial design             | 8  | Description of trial design including type of trial (eg, parallel group, crossover, factorial, single group), allocation ratio, and framework (eg, superiority, equivalence, noninferiority, exploratory) | 6   |

### Methods: Participants, interventions, and outcomes

|                      |     |                                                                                                                                                                                                                                                                                                                                                                                |      |
|----------------------|-----|--------------------------------------------------------------------------------------------------------------------------------------------------------------------------------------------------------------------------------------------------------------------------------------------------------------------------------------------------------------------------------|------|
| Study setting        | 9   | Description of study settings (eg, community clinic, academic hospital) and list of countries where data will be collected. Reference to where list of study sites can be obtained                                                                                                                                                                                             | 7    |
| Eligibility criteria | 10  | Inclusion and exclusion criteria for participants. If applicable, eligibility criteria for study centres and individuals who will perform the interventions (eg, surgeons, psychotherapists)                                                                                                                                                                                   | 8    |
| Interventions        | 11a | Interventions for each group with sufficient detail to allow replication, including how and when they will be administered                                                                                                                                                                                                                                                     | 8-10 |
|                      | 11b | Criteria for discontinuing or modifying allocated interventions for a given trial participant (eg, drug dose change in response to harms, participant request, or improving/worsening disease)                                                                                                                                                                                 | N/A  |
|                      | 11c | Strategies to improve adherence to intervention protocols, and any procedures for monitoring adherence (eg, drug tablet return, laboratory tests)                                                                                                                                                                                                                              | N/A  |
|                      | 11d | Relevant concomitant care and interventions that are permitted or prohibited during the trial                                                                                                                                                                                                                                                                                  | N/A  |
| Outcomes             | 12  | Primary, secondary, and other outcomes, including the specific measurement variable (eg, systolic blood pressure), analysis metric (eg, change from baseline, final value, time to event), method of aggregation (eg, median, proportion), and time point for each outcome. Explanation of the clinical relevance of chosen efficacy and harm outcomes is strongly recommended | 10   |
| Participant timeline | 13  | Time schedule of enrolment, interventions (including any run-ins and washouts), assessments, and visits for participants. A schematic diagram is highly recommended (see Figure)                                                                                                                                                                                               | 19   |

1  
2  
3  
4  
5  
6  
7  
8  
9  
10  
11  
12  
13  
14  
15  
16  
17  
18  
19  
20  
21  
22  
23  
24  
25  
26  
27  
28  
29  
30  
31  
32  
33  
34  
35  
36  
37  
38  
39  
40  
41  
42  
43  
44  
45  
46  
47

Sample size 14 Estimated number of participants needed to achieve study objectives and how it was determined, including clinical and statistical assumptions supporting any sample size calculations \_\_\_\_\_11\_\_\_\_\_

Recruitment 15 Strategies for achieving adequate participant enrolment to reach target sample size \_\_\_\_\_11\_\_\_\_\_

**Methods: Assignment of interventions (for controlled trials)**

Allocation:

Sequence generation 16a Method of generating the allocation sequence (eg, computer-generated random numbers), and list of any factors for stratification. To reduce predictability of a random sequence, details of any planned restriction (eg, blocking) should be provided in a separate document that is unavailable to those who enrol participants or assign interventions \_\_\_\_\_8\_\_\_\_\_

Allocation concealment mechanism 16b Mechanism of implementing the allocation sequence (eg, central telephone; sequentially numbered, opaque, sealed envelopes), describing any steps to conceal the sequence until interventions are assigned \_\_\_\_\_N/A\_\_\_\_\_

Implementation 16c Who will generate the allocation sequence, who will enrol participants, and who will assign participants to interventions \_\_\_\_\_8\_\_\_\_\_

Blinding (masking) 17a Who will be blinded after assignment to interventions (eg, trial participants, care providers, outcome assessors, data analysts), and how \_\_\_\_\_8\_\_\_\_\_

17b If blinded, circumstances under which unblinding is permissible, and procedure for revealing a participant's allocated intervention during the trial \_\_\_\_\_8\_\_\_\_\_

**Methods: Data collection, management, and analysis**

Data collection methods 18a Plans for assessment and collection of outcome, baseline, and other trial data, including any related processes to promote data quality (eg, duplicate measurements, training of assessors) and a description of study instruments (eg, questionnaires, laboratory tests) along with their reliability and validity, if known. Reference to where data collection forms can be found, if not in the protocol \_\_\_\_\_8-10\_\_\_\_\_

18b Plans to promote participant retention and complete follow-up, including list of any outcome data to be collected for participants who discontinue or deviate from intervention protocols \_\_\_\_\_N/A\_\_\_\_\_

|    |                     |     |                                                                                                                                                                                                                                                                   |             |
|----|---------------------|-----|-------------------------------------------------------------------------------------------------------------------------------------------------------------------------------------------------------------------------------------------------------------------|-------------|
| 1  |                     |     |                                                                                                                                                                                                                                                                   |             |
| 2  |                     |     |                                                                                                                                                                                                                                                                   |             |
| 3  | Data management     | 19  | Plans for data entry, coding, security, and storage, including any related processes to promote data quality (eg, double data entry; range checks for data values). Reference to where details of data management procedures can be found, if not in the protocol | ___9-11___  |
| 4  |                     |     |                                                                                                                                                                                                                                                                   |             |
| 5  |                     |     |                                                                                                                                                                                                                                                                   |             |
| 6  |                     |     |                                                                                                                                                                                                                                                                   |             |
| 7  | Statistical methods | 20a | Statistical methods for analysing primary and secondary outcomes. Reference to where other details of the statistical analysis plan can be found, if not in the protocol                                                                                          | ___10-11___ |
| 8  |                     |     |                                                                                                                                                                                                                                                                   |             |
| 9  |                     |     |                                                                                                                                                                                                                                                                   |             |
| 10 |                     | 20b | Methods for any additional analyses (eg, subgroup and adjusted analyses)                                                                                                                                                                                          | ___10-11___ |
| 11 |                     |     |                                                                                                                                                                                                                                                                   |             |
| 12 |                     | 20c | Definition of analysis population relating to protocol non-adherence (eg, as randomised analysis), and any statistical methods to handle missing data (eg, multiple imputation)                                                                                   | ___10___    |
| 13 |                     |     |                                                                                                                                                                                                                                                                   |             |
| 14 |                     |     |                                                                                                                                                                                                                                                                   |             |

### 15 **Methods: Monitoring**

|    |                 |     |                                                                                                                                                                                                                                                                                                                                       |           |
|----|-----------------|-----|---------------------------------------------------------------------------------------------------------------------------------------------------------------------------------------------------------------------------------------------------------------------------------------------------------------------------------------|-----------|
| 16 |                 |     |                                                                                                                                                                                                                                                                                                                                       |           |
| 17 | Data monitoring | 21a | Composition of data monitoring committee (DMC); summary of its role and reporting structure; statement of whether it is independent from the sponsor and competing interests; and reference to where further details about its charter can be found, if not in the protocol. Alternatively, an explanation of why a DMC is not needed | ___N/A___ |
| 18 |                 |     |                                                                                                                                                                                                                                                                                                                                       |           |
| 19 |                 |     |                                                                                                                                                                                                                                                                                                                                       |           |
| 20 |                 |     |                                                                                                                                                                                                                                                                                                                                       |           |
| 21 |                 |     |                                                                                                                                                                                                                                                                                                                                       |           |
| 22 |                 | 21b | Description of any interim analyses and stopping guidelines, including who will have access to these interim results and make the final decision to terminate the trial                                                                                                                                                               | ___N/A___ |
| 23 |                 |     |                                                                                                                                                                                                                                                                                                                                       |           |
| 24 |                 |     |                                                                                                                                                                                                                                                                                                                                       |           |
| 25 | Harms           | 22  | Plans for collecting, assessing, reporting, and managing solicited and spontaneously reported adverse events and other unintended effects of trial interventions or trial conduct                                                                                                                                                     | ___N/A___ |
| 26 |                 |     |                                                                                                                                                                                                                                                                                                                                       |           |
| 27 |                 |     |                                                                                                                                                                                                                                                                                                                                       |           |
| 28 | Auditing        | 23  | Frequency and procedures for auditing trial conduct, if any, and whether the process will be independent from investigators and the sponsor                                                                                                                                                                                           | ___N/A___ |
| 29 |                 |     |                                                                                                                                                                                                                                                                                                                                       |           |
| 30 |                 |     |                                                                                                                                                                                                                                                                                                                                       |           |
| 31 |                 |     |                                                                                                                                                                                                                                                                                                                                       |           |

### 32 **Ethics and dissemination**

|    |                          |    |                                                                                                                                                                                                                                  |           |
|----|--------------------------|----|----------------------------------------------------------------------------------------------------------------------------------------------------------------------------------------------------------------------------------|-----------|
| 33 |                          |    |                                                                                                                                                                                                                                  |           |
| 34 | Research ethics approval | 24 | Plans for seeking research ethics committee/institutional review board (REC/IRB) approval                                                                                                                                        | ___7-8___ |
| 35 |                          |    |                                                                                                                                                                                                                                  |           |
| 36 |                          |    |                                                                                                                                                                                                                                  |           |
| 37 | Protocol amendments      | 25 | Plans for communicating important protocol modifications (eg, changes to eligibility criteria, outcomes, analyses) to relevant parties (eg, investigators, REC/IRBs, trial participants, trial registries, journals, regulators) | ___7-8___ |
| 38 |                          |    |                                                                                                                                                                                                                                  |           |
| 39 |                          |    |                                                                                                                                                                                                                                  |           |
| 40 |                          |    |                                                                                                                                                                                                                                  |           |
| 41 |                          |    |                                                                                                                                                                                                                                  |           |
| 42 |                          |    |                                                                                                                                                                                                                                  |           |
| 43 |                          |    |                                                                                                                                                                                                                                  |           |
| 44 |                          |    |                                                                                                                                                                                                                                  |           |
| 45 |                          |    |                                                                                                                                                                                                                                  |           |
| 46 |                          |    |                                                                                                                                                                                                                                  |           |
| 47 |                          |    |                                                                                                                                                                                                                                  |           |

1  
2  
3  
4  
5  
6  
7  
8  
9  
10  
11  
12  
13  
14  
15  
16  
17  
18  
19  
20  
21  
22  
23  
24  
25  
26  
27  
28  
29  
30  
31  
32  
33  
34  
35  
36  
37  
38  
39  
40  
41  
42  
43  
44  
45  
46  
47

|                               |     |                                                                                                                                                                                                                                                                                     |       |
|-------------------------------|-----|-------------------------------------------------------------------------------------------------------------------------------------------------------------------------------------------------------------------------------------------------------------------------------------|-------|
| Consent or assent             | 26a | Who will obtain informed consent or assent from potential trial participants or authorised surrogates, and how (see Item 32)                                                                                                                                                        | 7-8   |
|                               | 26b | Additional consent provisions for collection and use of participant data and biological specimens in ancillary studies, if applicable                                                                                                                                               | N/A   |
| Confidentiality               | 27  | How personal information about potential and enrolled participants will be collected, shared, and maintained in order to protect confidentiality before, during, and after the trial                                                                                                | 8-9   |
| Declaration of interests      | 28  | Financial and other competing interests for principal investigators for the overall trial and each study site                                                                                                                                                                       | 14    |
| Access to data                | 29  | Statement of who will have access to the final trial dataset, and disclosure of contractual agreements that limit such access for investigators                                                                                                                                     | 14    |
| Ancillary and post-trial care | 30  | Provisions, if any, for ancillary and post-trial care, and for compensation to those who suffer harm from trial participation                                                                                                                                                       | N/A   |
| Dissemination policy          | 31a | Plans for investigators and sponsor to communicate trial results to participants, healthcare professionals, the public, and other relevant groups (eg, via publication, reporting in results databases, or other data sharing arrangements), including any publication restrictions | 12-13 |
|                               | 31b | Authorship eligibility guidelines and any intended use of professional writers                                                                                                                                                                                                      | 15    |
|                               | 31c | Plans, if any, for granting public access to the full protocol, participant-level dataset, and statistical code                                                                                                                                                                     | N/A   |
| <b>Appendices</b>             |     |                                                                                                                                                                                                                                                                                     |       |
| Informed consent materials    | 32  | Model consent form and other related documentation given to participants and authorised surrogates                                                                                                                                                                                  | 21-31 |
| Biological specimens          | 33  | Plans for collection, laboratory evaluation, and storage of biological specimens for genetic or molecular analysis in the current trial and for future use in ancillary studies, if applicable                                                                                      | N/A   |

---

\*It is strongly recommended that this checklist be read in conjunction with the SPIRIT 2013 Explanation & Elaboration for important clarification on the items. Amendments to the protocol should be tracked and dated. The SPIRIT checklist is copyrighted by the SPIRIT Group under the Creative Commons "[Attribution-NonCommercial-NoDerivs 3.0 Unported](https://creativecommons.org/licenses/by-nc-nd/3.0/)" license.
